# Supplementary material for: Petitioning the FDA to Improve Pharmaceutical, Device and Public Health Safety by Ordinary Citizens: A Descriptive Analysis
Source: PLoS One. 2016 May 12;11(5):e0155259. doi: 10.1371/journal.pone.0155259 (PMC4865109; doi:10.1371/journal.pone.0155259)
Supplement: S1 File — Listing of all citizen petitions filed in the public interest by petitioners other than pharmaceutical or device manufacturers, 2001–2013. (XLSX) [file pone.0155259.s001.xlsx]

## Sheet: Notation
	Public Petition
	Public Pending
	Enterprise Petition
Reason for Decision
	Insufficient scientific basis
	Insufficient legal basis
	Insufficient scientific and legal basis
	Moot
Decision
	Denials
	Approvals
	Partial approval and denial
	Partial approval and denial*

## Sheet: Summary Statistics 
Total Number of Public Petitions by Years and Types
Number of Petitions	Types of Petitions
Years	Device	Drug	Other	Grand Total
2001		3	8	11
2002	2	6	9	17
2003	10	5	5	20
2004	3	11	16	30
2005	4	22	13	39
2006	8	21	9	38
2007	7	16	14	37
2008	7	4	21	32
2009	6	16	9	31
2010	12	8	9	29
2011	9	1	10	20
2012	3	7	11	21
2013	3	9	8	20
Grand Total	74	129	142	345
Total Number of Petitions by Decisions
Decisions	Number of Petitions	Percentage
Answered	2	0.0057971
Approval	6	0.0173913
Denial	137	0.397101
Parital Approval and Denial*	18	0.0521739
Partial Approval and Denial	16	0.0463768
Pending	157	0.455072
Withdrawn	9	0.026087
Grand Total	345	1
Decision	(Multiple Items)
Total Number of Denied/Patrtial Denied Petitions by Reason
Row Labels	Number of Public Petitions	percentage
Document missing	1	0.00584795
Insufficient factual basis	3	0.0175439
Insufficient legal basis	30	0.175439
Insufficient scientific and legal basis	19	0.111111
Insufficient scientific basis	108	0.631579
Mistaken Fact	1	0.00584795
Moot	7	0.0409357
Petitioner died on January 7,2006.	1	0.00584795
A denial may be either by FDA action within the loo-day period, which ends on July 18, 2004 or by a lack of action by FDA within the initial l00-day period in which case the petition shall be deemed to be denied unless an extension is mutually agreed upo	1	0.00584795
Grand Total	171	1
Average Numer of Days to Decision (Untill 02/01/2015)
Row Labels	Average of days
Answered	166
Approval	722.5
Denial	965.467
Parital Approval and Denial*	1235
Partial Approval and Denial	731.25
Pending	2550.97
Withdrawn	924.889
Grand Total	1680.27
Total Number of Petitions by Type of Petitioners
Row Labels	Count of Docket No.
Individual	145
Non-profit	200
Grand Total	345

## Sheet: Total
Year	Docket No.	Petitioner	Petitioner Type	Product Name/Issue	Category	Receipt Date	Decision Date	Days to Decision	Decision Summary	Decision	Reason for Decision
2013	FDA-2013-P-0735	Mario Morais	Individual	Request that Ombudseman for Center for Devices and Radiological Devices to forward comments and answer comment with respect to Chronic Cerebrospinal Venous Insufficiency	Device	2013-06-11	2014-06-19	373	We grant your request to forward your comment to the Executive Secretariat. While FDA appreciates your interest in alternative treatments for multiple sclerosis (MS), FDA is not aware of valid scientific evidence demonstrating that the CCSVI procedure is effective in treating MS. Data to support CCSVI as a clinical entity on its own or its relationship with MS are at times contradictory and there…	Partial Approval and Denial*	Insufficient scientific basis
2012	FDA-2012-P-0119	Mario Morais	Individual	The current FDA rules and regulations protect clinical trials, not human life or human rights	Other	2012-02-03	2014-06-19	867	FDA (1) granted petitioner's request to forward his comment to the FDA Executive Secretariat; (2) denied the request to post petitioner's comments "FDA does not post citizen petitions as part of its safety communications to the public"; (3) and granted request to provide a comment to petitioner's email sent on June 11, 2012	Partial Approval and Denial*	Insufficient legal basis
2012	FDA-2012-P-0404	Public Citizen Health Research Group	Non-profit	Immediately remove from the market the diabetes drug Victoza (liraglutide)	Drug	2012-04-20	2014-03-25	704	We have determined, based on the information available to us at this time, that initiating the withdrawal of the marketing approval of Victoza is not warranted. The safety concerns you raise in the Petition were appropriately and thoroughly considered at the time of initial approval of the Victoza NDA. Since approval, there have been no new safety findings from FDA's ongoing surveillance, or rais…	Denial	Insufficient scientific basis
2012	FDA-2012-P-0747	Leroy Leslie Hamilton, Ph.D.	Individual	Conduct an impartial investigation to determine whether Form FDA 3429 General Device Classification questionnaire is in compliance with the definition of class III.	Device	2012-07-10	2013-03-04	237	FDA has investigated Form FDA 3429 and has determined changes should be made to more closely align the form with section 513(a)(l)(C) of the Federal Food, Drug, and Cosmetic Act (FD&C Act).	Approval
2012	FDA-2012-P-1160	Steven A. Zecola	Individual	Recognize breast cancer in individuals who are positive for the BRCA-1 gene mutation as a distinct group and withdraw approval of anthracycline, cyclophosphamide and taxane drugs (ACT) as an adjuvant therapy for BRCA1-related breast cancer because these drugs expose patients to safety risks and have not been shown to be effective in this group.	Drug	2012-11-20	2014-07-09	596	The information presented in your Petition does not suggest that there is a lack of substantial evidence that ACT drugs are effective in the BRCA-l subgroup. In addition, the information presented in your Petition does not suggest that the drugs are unsafe for use or have not been shown to be safe for use under the conditions of use approved in their applications.	Denial	Insufficient scientific basis
2012	FDA-2012-P-0607	AIDS Healthcare Foundation	Non-profit	Invalidate the findings and recommendations of the Antiviral Drugs Advisory Committee (A VDAC), with respect to an efficacy supplement for a new drug application (sNDA) of Gilead Sciences, Inc. (Gilead) for once-daily Truvada (emtricitabine/tenofovir disoproxil fumarate) for pre-exposure prophylaxis (PrEP) to reduce the risk of sexually acquired human immunodeficiency virus-1 (HIV -1) transmissio…	Drug	2012-06-08	2012-07-16	38	AHF has not provided any evidence or specific allegations to support the conclusion that the objectivity of the committee should be questioned. Therefore, your request that FDA not rely on, and invalidate the findings and recommendations of the AVDAC regarding Gilead’s sNDA and convene a new advisory committee is denied.	Denial	Insufficient factual basis
2012	FDA-2012-P-0226	AIDS Healthcare Foundations	Non-profit	Not approve a pending supplemental new drug application (supplement or sNDA) submitted by Gilead Sciences, Inc. (Gilead) on December 15, 2011, which seeks permission to market once daily Truvada (emtricitabine/tenofovir disoproxil fumarate) for preexposure prophylaxis (PrEP) to reduce the risk of sexual acquisition of human immunodeficiency virus-l (HIV- 1) in uninfected adults at high risk. AHF …	Drug	2012-03-07	2012-07-16	131	The Agency believes that the benefits of Truvada for reduction in the risk of sexually acquired HIV -1 infection in high risk individuals outweigh its risks when taken as directed and used in combination with a comprehensive strategy for risk reduction including safer sex practices.	Denial	Insufficient scientific basis
2012	FDA-2012-P-0818	Physicians for Responsible Opioid Prescribing	Non-profit	Change opioid analgesic labels as follows: (1) "[s]trike the term 'moderate' from the indication for non-cancer pain," (2) "[a]dd a maximum daily dose, equivalent to 100 milligrams of morphine for noncancer pain," and (3) "[a]dd a maximum duration of 90-days for continuous (daily) use for noncancer pain."	Drug	2012-07-25	09/10/2013	412	FDA has determined that safety labeling changes to the labeling of ER/LA opioid analgesics are needed to more effectively communicate to prescribers the serious risks associated with these drugs. PROP’s request that FDA remove the term "moderate" from the indication for ER/LA opioid analgesic drugs is granted. For PROP’s labeling change requests limited to "non-cancer" pain, a distinction that is…	Partial Approval and Denial	Insufficient scientific basis
2012	FDA-2012-P-0857	Sheller, P.C.	Individual	Take certain actions related to your pending citizen petition regarding Risperdal (risperidone) and Invega (paliperidone).	Drug	2013-07-02	2014-11-25	511	Based on reviews of clinical data submitted by the sponsor, published literature, and postmarketing surveillance, there is no evidence that the drug is unsafe, and no evidence that the drug is not shown to be safe, for use under the conditions of use upon the basis of which the applications were approved that would warrant revocation of the pediatric indication of these drugs. The lack of quality…	Partial Approval and Denial*	Insufficient scientific basis
2011	FDA-2011-P-0497	Daniel J. Popeo, Washington Legal Foundation	Non-profit	Request FDA Not to Use Advice from IOM Committee That Fails to Comply with FACA's Fair Balance Requirement	Device	2011-06-13	2012-02-12	244	FDA disagrees that the 10M 510(k) Committee was not fairly balanced; FDA declines to issue a guidance document explaining FDA's obligations under FACA and what advisory committees must do in order to permit FDA to make use of any advice or recommendations provided to the agency	Denial	Insufficient scientific basis
2011	FDA-2011-P-0552	Robert Wagner	Individual	Request to Issue Regulations Related to Outdoor Luminaires	Device	2011-07-19	2011-12-16	150	Requiring manufacturers of outdoor luminaires to attach a warning statement to their products and in the installation instructions would be overly burdensome and not supported by current scientific literature.	Denial	Insufficient scientific basis
2011	FDA-2011-P-0777	Thomas W. Nerney, Institute for Health Quality and Ethics	Non-profit	Request to Fully Implement and Enforce Mammogram Quality Standards Amendment Act of 1992	Device	2011-10-21	2013-10-28	738	To the extent that your citizen petition requests that FDA initiate enforcement action(s), please note that this type of request is not within the scope of FDA's citizen petition procedures.	Denial	Insufficient legal basis
2011	FDA-2011-P-0923	Michael A. Carome, M.D., Public Citizen's Health Research Group	Non-profit	Request to Immediately Withdraw Approval of Humanitarian Device Exemption (HDE) Application for Wingspan Stent System	Device	2011-12-22	2012-08-08	230	FDA has taken other actions intended to address many of the underlying concerns in your petition; because of these other regulatory actions, the agency does not believe that withdrawal of the HDE is warranted.	Denial	Insufficient scientific basis
2011	FDA-2011-P-0641	Michael Carome, Public Citizen's Health Research Group	Non-profit	Recall and ban the marketing of all non-absorbable surgical mesh products for transvaginal repair of pelvic organ prolapse (POP); classify all new non-absorbable surgical mesh product for transvaginal repair ofP OP as class III devices	Device	2011-08-26	2014-05-01	979	The FDA agency does not believe that a ban or recall of non-absorbable surgical mesh for transvaginal repair of POP is warranted at this time. Further, a citizen petition is not the appropriate mechanism for requesting a reclassification of a device. See 21 C.F.R.10.30(a) and 21 C.F.R. 860.1 30. Reclassification petitions must be filed in accordance with 21 C.F.R. 860.1 23.	Denial	Insufficient scientific and legal basis
2011	FDA-2011-P-0055	C. Allen Black, Ph.D., J.D.	Individual	Require Genzyme Corporation (Genzyme) to allocate full doses of Fabrazyme (agalsidase beta) to U.S. citizens under FDA's consent decree with Genzyme.	Drug	2011-01-19	2014-08-11	1300	Since Fabrazyme is no longer in shortage and patients currently receiving full doses of the drug, the Petitioners' request that FDA control Genzyme's distribution of Fabrazyme under the Consent Decree is moot	Denial	Moot
2010	FDA-2010-P-0089	Center for Tobacco Regulation, Litigation and Advocacy, University of Maryland School of Law	Non-profit	Agency alter the manner in which it reviews, regulates, and labels nicotine replacement therapy medications	Drug	2010-02-12	2013-04-01	1144	We remain committed to meeting with NDA holders interested in developing new indications for currently approved OTC NRT products corresponding to your requests, and/or reviewing data submitted by NDA holders to support any of your proposed labeling changes. However, petition is denied to the extent these labeling changes are requested as a response to these citizen petitions and to the extent Pet…	Partial Approval and Denial*	Insufficient legal basis
2010	FDA-2010-P-0339	Richard F. Edlich, M.D., Ph.D., University of Virginia Health System Trauma Specialists, LLP, Legacy Emanuel Hospital	Individual	Require all operating room personnel to wear a powder-free double glove hole indicator system when performing surgical procedures on patients diagnosed with Human Immunodeficiency Virus (HIV), Hepatitis B, or Hepatitis C.	Other	2010-06-23	2012-01-31	587	You have not provided evidence that there is a need for any additional regulatory requirements with regard to surgeon's gloves at this time.	Denial	Insufficient scientific basis
2010	FDA-2010-P-0393	Mr. Pack, Mr. Merrill, Ms. Haight and Ms. Rovero	Individual	Issue a public statement clarifying that there is insufficient in vivo clinical data to support news reports that the newly FDA-approved, reformulated OxyContin is less addictive or less abusable than the traditional OxyContin formulation or other extended-release oxycodone medications.	Drug	2010-07-20	2011-11-07	475	We believe that the News Release and the Q&As were not likely to mislead prescribers into thinking that reformulated OxyContin is no longer subject to abuse and misuse. FDA does not have regulatory authority over a third party's statements, such as media reports, about FDA regulated products, unless those statements are made on behalf of the sponsor. Thus, it is not appropriate for FDA to require…	Denial	Insufficient legal basis
2010	FDA-2010-P-0377	Great Lakes Environmental Law Center; Natural Resources Defense Council	Non-profit	Revoke 21 CFR § 25.31 (b) which establishes a categorical exclusion from the requirement to prepare an environmental assessment or environmental impact statement for certain Agency actions	Other	2010-07-12	2013-02-22	956	Based on our review and analysis of the relevant available scientific information, we have determined that the 1 ppb Categorical Exclusion should not be revoked. We believe that we can address concerns about the environmental effects of pharmaceuticals, such as the ones you raise, by making a finding of extraordinary circumstances, when appropriate.	Denial	Insufficient scientific basis
2010	FDA-2010-P-0454	Campaign for Tobacco-Free Kids See FDA-2010-P-0089	Non-profit	Agency alter the manner in which it reviews, regulates, and labels nicotine replacement therapy medications	Drug	2010-02-12	2013-04-01	1144	Combined response to three separate Citizen Petitions. See FDA-2010-P-0089	Partial Approval and Denial	Insufficient scientific and legal basis
2010	FDA-2010-P-0592	Richard F. Edlich, MD, PhD	Individual	FDA ban the sale of liquid (elemental) mercury to consumers.	Other	2010-11-17	2011-08-12	268	Denied because elemental mercury regulated by FDA is not to be sold directly to consumers.	Denial	Insufficient legal basis
2010	FDA-2010-P-0446	Richard F. Edlich, M.D., Ph.D. University of Virginia Health System	Individual	Require surgical glove manufacturers to place on each surgical glove and package containing surgical gloves a warning label indicating that the glove hole leakage rate is 1.5%.	Device	2010-08-20	2012-01-31	529	FDA considers a 1.5 acceptable quality level (AQL) to be the minimum quality level acceptable for surgeon glove lots subjected to water leak performance testing.	Denial	Insufficient scientific basis
2010	FDA-2010-P-0179	Stradley Ronon Stevens & Young, LLP; Richard Semelka, M.D. & Diego R. Martin, M,D., Ph.D., F.R.C.P.	Individual	Continue class labeling in the pharmacologic class of gadolinium-based contrast agents relating to the risk of nephrogenic systemic fibrosis (NSF) and refrain from implementing differential NSF risk-based labeling; and other related requests.	Drug	4/1/2010; 6/11/2010	2010-12-20	263	The dosing statement proposed in the Semelka Petition is not consistent with the information conveyed in the current labeling, and the Semelka Petition provides no data to support its proposal. In the absence of substantiation, we do not agree that the dosing recommendations contained in the approved labeling should be changed. Pursuant to section 505(O)(4) of the FD&C Act, we approved labeling c…	Partial Approval and Denial	Insufficient scientific basis
2010	FDA-2010-P-0312	Natural Resources Defense Council	Non-profit	Immediately recall and withdraw approval of lindane as a treatment option for head lice and scabies	Drug	2010-06-15	2012-11-20	889	You have not provided any new or persuasive evidence that lindane’s risk-benefit profile has changed such that FDA should find that the benefits of the product, when used as currently labeled, outweigh its risks. Other information you cite is not relevant to FDA's continuing assessment of the risk-benefit profile for lindane under the Agency’s existing legal authority.	Denial	Insufficient scientific basis
2009	FDA-2009-P-0074	E Douglas Kramer, MD	Individual	Review abbreviated NDA for Subutex/Suboxone	Drug	2009-02-13	2009-02-23	10	Withdrawn	Withdrawn
2009	FDA-2009-P-0111	Thomas J. Quin	Individual	Request to "fine Carestream Health and order full compliance with 21 CFR 1020.30-32 and 820.170"	Other	2009-02-24	2009-10-13	231	Requests to initiate enforcement actions not within the scope of the FDA's petition procedures.	Denial	Insufficient legal basis
2009	FDA-2009-P-0124	Todd Crum	Individual	Test women for blood disorder factor V Leiden (and other blood clots) before prescribing 3-gen oral contraceptives	Drug	2009-02-23	2013-05-10	1537	Scientific literature and the medical consensus is that pre-screening is unnecessary.	Denial	Insufficient scientific basis
2009	FDA-2009-P-0186	Caryn Kanzer	Individual	Immediately remove Patent 5,045,552, "Pyridine derivatives having anti-ulcerative activity," from listing in FDA's Approved Drug Products with Therapeutic Equivalence Evaluations (Orange Book), to permit generic equivalents to enter the market in the United States.drug,2Aciphex (rabeprazole sodium), to enter the market in the United States.	Drug	2009-04-09	2009-10-01	175	Because your request disputes the appropriateness of listing Patent 5,045,552 and urges FDA to remove it from the Orange Book, your request is subject to the procedures set forth in specific regulation. Submission of your request to FDA in a citizen petition does not comply with those procedures, and we are unable to resolve your concerns in a citizen petition response.	Denial	Insufficient legal basis
2009	FDA-2009-P-0208	Public Citizen's Health Research Group	Non-profit	Request sufficient safety warning for Amitiza (lubiprostone) for safe use in women of child-bearing potential	Drug	2009-05-06	2012-11-26	1300	We disagree with your assessment of the risks of Amitiza for women of child-bearing potential	Denial	Insufficient scientific basis
2009	FDA-2009-P-0227	The National Center on Addiction And Substance Abuse at Columbia University	Non-profit	Promulgate regulations intended to strengthen FDA regulation of opioids and other controlled prescription drugs and to help minimize the risks of diversion and abuse of such drugs	Drug	2009-05-15	2013-06-17	1494	See FDA-2007-P-0009, Denied. We do not think a rule requiring a REMS for all opioids is appropriate or warranted at this time, and we note that the Federal Food, Drug, and Cosmetic Act (FD&C Act or Act) does not require that FDA promulgate such a rule. We do not think it appropriate at this time to require sponsors to certify that drugs have been formulated to minimize the potential for abuse wit…	Denial	Insufficient scientific and legal basis
2009	FDA-2009-P-0425	Gail Elbek	Individual	Take regulatory action concerning extensive documented evidence proving multiple health-damaging effects are caused by soyphytotoxic endocrine disruptors and antinutrients	Other	2009-08-31	2012-03-28	940	In summary, you have not clearly stated the actions you are requesting, including the language of the regulations that you are requesting. Additionally, you have not provided the factual and legal grounds on which you rely as support for your requested actions. As such, you have failed to comply with the requirements in § 10.30(b).	Denial	Insufficient legal basis
2009	FDA-2009-P-0446	Virginia Commonwealth University Institute for Drug and Alcohol Studies	Non-profit	Modify the product labeling and limit the distribution of buprenorphine	Drug	2009-09-16	3/151/2000	263	With respect to your petition, we must evaluate your two requested actions on their own merits and under the scientific, legal, and regulatory framework that governs labeling changes and the imposition of restrictions on distribution. The petition fails to present evidence indicating that the additional restrictions are necessary, and FDA does not have such evidence at this time	Denial	Insufficient scientific basis
2009	FDA-2009-P-0471	Mr. Antell and Mr. Brayshaw	Individual	Recognize the crisis of hepatitis C (HCV) among people with bleeding disorders and take definite steps to allow people with bleeding disorders and HCV to have access to promising HCV investigational drugs beyond current clinical trials	Drug	2009-09-29	2010-04-23	206	FDA has a long history of taking whatever actions it can, consistent with its statutory authority, to promote appropriate access to investigational drugs for those with serious and life-threatening diseases and no satisfactory alternatives. Therefore, we grant your request relating to access. We deny your request to revise the document, "Development of novel agents for the treatment of chronic he…	Partial Approval and Denial	Insufficient scientific and legal basis
2009	FDA-2009-P-0553	Darrin Malakowsky	Individual	Amend the listing of color additives exempt from certification to include Mica-based pearlescent pigments	Other	2009-11-10	2010-04-27	168	WITHDRAWN	Withdrawn
2009	FDA-2009-P-0594	Center for Food Safety; Institute for Agriculture and Trade Policy	Non-profit	Immediately suspend the approval of all new animal drug applications (NADAs) for arsenic-containing compounds used as feed additives for food animals	Other	2009-12-11	2011-08-09	606	WITHDRAWN	Withdrawn
2009	FDA-2009-P-0595	Public Citizen's Health Research Group	Non-profit	Immediately ban the weight loss drug Meridia (sibutramine) because of the early results from the Sibutramine Cardiovascular Outcomes Trial (SCOUT trial) and reports to FDA's Adverse Event Reporting System (AERS)	Drug	2009-12-03	2011-01-03	396	We have reviewed the petition and other relevant information available to us. Your petition requesting that FDA remove the weight loss drug Meridia (sibutramine) from the U.S. market is granted. FDA recognizes that obesity is a serious problem and that drug products could play a role in combating this health issue. However, after carefully evaluating the data from the SCOUT trial and other releva…	Approval
2009	FDA-2009-P-0598	James Matthew Weber	Individual	Amend the labeling requirements for iodine-containing intravenous contrast agents to include specific warnings and identify known risk factors for kidney damage	Drug	2009-12-17	2013-09-30	1383	DENIED, but document is missing from FDA website	Denial	Document missing
2009	FDA-2009-P-0154	E. Douglas Kramer, UNC Gillings School of Global Public Health	Individual	Apply certain standards to generic versions of Subutex (buprenorphine hydrochloride (HCl) sublingual tablets) and Suboxone (buprenorphine HCl and naloxone HCl dihydrate sublingual tablets)	Drug	2009-03-17	2009-09-03	170	Your petition includes information supporting the conclusion with respect to the dangers of talc as an ingredient. Even accepting that premise, however, it does not follow that the solution is to require all generic versions of these products to contain the same inactive ingredients as the innovator’s products. There is no basis to conclude that the inactive ingredients in the innovator products …	Denial	Insufficient scientific basis
2009	FDA-2009-P-0150	Arthur K. Yellin	Individual	Create a Separate Classification for Gloves used in Preparing and Administering Chemotherapeutic Drugs	Device	2009-03-18	2010-08-24	524	FDA agrees that a new product code for medical gloves labeled and intended for use in the preparation and administration of chemotherapeutic drugs would be useful and, as discussed below, has created a new product code. However, we do not believe these gloves have a different intended use or should be classified separately from patient examination gloves.	Denial	Insufficient scientific basis
2009	FDA-2009-P-0207	Thomas Quinn	Individual	Request for Immediate Class One Recall of Philips Medical Devices	Device	2009-05-05	2013-09-30	1609	Requests for the agency to initiate enforcement actions are not within the scope of FDA's citizen petition procedures	Denial	Insufficient legal basis
2009	FDA-2009-P-0253	Scott A. Tolchin	Individual	Petition for FDA to Inspect LASIK Cinics to Ensure Compliance with 21 CFR 803, Subpart C User Facility Reporting Requirements	Device	2009-05-25	2010-05-18	358	The petition process does not apply for the initiation of a court proceeding	Denial	Insufficient legal basis
2009	FDA-2009-P-0362	Ryszard Rokicki	Individual	Request that FDA Issue an Order Mandating Inspection of every peripheral stent, cardiovascular stent, heart valve and IVC filter composed of Nitinol for Intermetallic Inclusions before Sterilization	Device	2009-07-29	2011-02-25	576	Because of the multiple factors determining Nitinol fatigue life from intermetalic inclusions, a requirement that Nitinol products be inspected individually for intermetallic inclusions prior to implantation in the body is not justified. FDA has determined that visually inspecting samples from a lot per ASTM F2063 achieves the proper balance of providing patients with safe and effective Nitinol p…	Denial	Insufficient scientific basis
2009	FDA-2009-P-0437	Edward Manougian	Individual	Establish testing methods for products to be used by the lay public in emergency situations	Device	2010-03-07	2010-08-24	170	Your requested action does not involve the issuance, amendment, or revoking of a regulation or order; therefore your petition was viewed as request to take or refrain from taking any other form of administration action; under 21 CFR 10.3(a), an administrative action does not include the referral of apparent violations to US attorneys for the institution of civil or criminal proceedings or an act …	Denial	Insufficient legal basis
2009	FDA-2009-P-0566	American Dental Association	Non-profit	Review and establish an appropriate regulatory classification for all tooth whitening preparations that act by chemical means to lighten tooth color	Drug	2009-11-24	2014-04-22	1610	You did not provide information in your citizen petition that would allow us to classify the group of chemical, peroxide-containing tooth whitener products as drugs. Further information, including which ingredients and which concentrations of peroxide-containing tooth whiteners may affect the structure or function of the body and/or the intended uses of such products would be required before we c…	Denial	Insufficient scientific basis
2009	FDA-2009-P-0156	K Paul Stoller, MD FACM	Individual	Withdraw approval for the chemical commonly known as aspartame	Other	2009-03-18	2014-10-24	2046	The safety of aspartame has been reviewed repeatedly, not only by FDA, but by other regulatory authorities, including those of Canada, the United Kingdom, Australia, Europe, and Japan. All these authorities agree that aspartame is safe for the general population except for individuals with phenylketonuria. Despite your assertions, you have not identified any scientific data or other information t…	Denial	Insufficient scientific basis
2009	FDA-2009-P-0357	International Academy of Oral Medicine and Toxicology	Non-profit	Petition to Ban Dental Amalgam or Classify the Device as Class III	Device	2009-07-28	2015-01-27	2009	FDA has carefully reviewed the additional references you have provided with your citizen petition, and we find them insufficient to support a ban of dental amalgam because they do not establish that there is a substantial deception or an unreasonable and substantial risk of illness of injury from use of dental amalgam as currently regulated by FDA. For the most part, the additional scientific ref…	Denial	Insufficient scientific and legal basis
2009	FDA-2009-P-0039	Parents United for Pharmaceutical Safety and Accountability	Non-profit	Take numerous safety actions with respect to Singulair	Drug	2009-01-30	2011-06-07	858	Petition is denied as to requests (1) through (6) (requiring more information to be given), but granted as to request (7) (ensure updated information is communicated to physicians and patients). Although your Supplement discusses various potential adverse events that could be linked to the use of Singulair, the safety and effectiveness of Singulair has been established by extensive clinical studi…	Partial Approval and Denial*	Insufficient scientific basis
2009	FDA-2009-P-0426	Medical Technology and Practice Patterns Institute	Non-profit	Require changes to labeling of and addiitonal safety warnings for Epogen/Procrit (epoetin alfa) and Aranesp (darbepoetin alfa) with respect to a safe target hematocrit/hemoglobin range and a safe dose	Drug	2009-09-01	2011-06-24	661	Based on our review and analysis of the data, your Petition is granted in part with respect to your request that FDA require the boxed warning for Epogen/Procrit to state that a maintenance target hemoglobin/hematocrit range has not been established for CKD patients. FDA's conclusion that this statement should be added to the boxed warning was based on its reanalysis of data from controlled clini…	Partial Approval and Denial	Insufficient scientific basis
2008	FDA-2008-P-0197	W.J. Kennick	Individual	Determine whether Tomatis Electronic Ear is a medical device, refrain taking any administrative action and approve it as a medical device	Device	2008-03-20	2008-11-26	251	Tomatis Electronic Ear is a medical device subject to laws and regulations applicable to medical devices. The manufacturer has not submitted a premarket notification or a premarket approval application for this device, and accordingly FDA has not cleared or approved the product.	Denial	Mistaken Fact
2008	FDA-2008-P-0252	Richard W. Treharne, PhD	Individual	Withdraw FDA Policy on Establishing Preamendments Status	Device	2008-04-21	2010-12-21	974	Policy is supported by the statutory language and legislative history of the Medical Device Amendments (MDA), the regulations implementing the MDA, and FDA's longstanding policy regarding demonstrations of commercial distribution and pre-amendment status as evidenced in CPO section 300.600, issued in 1978.	Denial	Insufficient legal basis
2008	FDA-2008-P-0319	Lauranell H. Burch	Individual	Ban the use of all Refractive Surgery Lasers for LASIK Surgery and Acknowledge and Enforce Remedy for the Misbranding of lasers used for LASIK	Device	2008-05-28	2009-07-16	414	Because FDA is not aware of any data, and petitioner did not provide any data, that would indicate refractive surgery lasers present an "unreasonable and substantial risk" of illness and injury, there is no basis to ban such devices and FDA is denying this request. To the extent petitioner are petitioning the agency to take a particular enforcement action, however, we are denying that request sin…	Denial	Insufficient scientific and legal basis
2008	FDA-2008-P-0061	Public Citizen Health Research Group	Non-profit	Require the Biologics License Application (BLA) holders of all formulations of botulinum toxin to issue a Dear Health Care Professional (DHCP)letter to black box warning	Drug	2008-01-23	2009-04-30	463	Based on our analysis, we have determined that a REMS is necessary for botulinum toxin products, and that a Communication Plan should be one of the elements of the REMS. Petition is granted in part with respect to additional warnings (including a boxed warning) in product labeling regarding the risk of distant spread of the toxin effects from the site of injection. Your request that we require a …	Partial Approval and Denial	Insufficient scientific basis
2008	FDA-2008-P-0116	Campaign for Tobacco-Free Kids See FDA-2010-P-0089, 0454	Non-profit	Alter the manner in which it reviews, regulates, and labels nicotine replacement therapy medications	Other	2010-02-12	2013-04-01	1144	We remain committed to meeting with NDA holders interested in developing new indications for currently approved OTC NRT products corresponding to your requests, and/or reviewing data submitted by NDA holders to support any of your proposed labeling changes. However, petition is denied to the extent these labeling changes are requested as a response to these citizen petitions and to the extent Pet…	Partial Approval and Denial*	Insufficient scientific basis
2008	FDA-2008-P-0211	University of Pennsylvania School of Medicine	Non-profit	Amend 21 CFR § 50.25, Elements of Informed Consent, by adding two additional subsections: • A description of deviations from standard medical practice and • A disclosure of investigator and referring physician conflicts of interest.	Other	2008-03-31	2010-01-20	660	Current FDA regulations adequately address Petitioner's concerns, but FDA intends to revise the Guide to Informed Consent to address your other requests.	Denial	Insufficient scientific basis
2008	FDA-2008-P-0296	Public Citizen Health Research Group	Non-profit	FDA withdraw approval of NDA for Ortho Evra	Drug	2008-05-08	2012-08-22	1567	Based upon our review of all of the available evidence, we have not found that Ortho Evra is "unsafe for use under the conditions of use upon the basis of which the application was approved" nor have we found new evidence that such drug is not shown to be safe for use under the conditions of use upon the basis of which the application was approved"	Denial	Insufficient scientific basis
2008	FDA-2008-P-0347	Joanne K. Tobacman, M.D.	Individual	FDA revoke the regulations in Title 21, Code of Federal Regulations (eFR) that permit the use of carrageenan for direct addition to food	Other	2008-06-11	2012-06-11	1461	FDA concludes that your petition does not adequately support your requested action.	Denial	Insufficient scientific basis
2008	FDA-2008-P-0545	Washington State University	Non-profit	that FDA "reexamine the current policy on collecting blood donations from men who have sex with men (MSM)"	Other	2008-09-04	2010-05-27	630	We deny your petition to the extent you are requesting FDA to commit now to how the agency may ultimately revise our policy in the future. We grant your petition, in part, to reexamine the MSM blood donor deferral issue, taking into account the current body of scientific information.	Partial Approval and Denial*	Insufficient scientific basis
2008	FDA-2008-P-0577	Natural Resources Defense Council	Non-profit	Issue a regulation prohibiting the use of bisphenol A (in human food and food packaging, and revoke all regulations permitting the use of any food additive that may result in BPA becoming a component of food	Other	2008-10-28	2012-03-30	1249	We determined that it failed to provide sufficient data and information to persuade FDA to initiate rulemaking under 21 U.S.C. § 348(d) and (i) and 21 CFR 171.130 to revoke regulations permitting the use of BM in food contact materials.	Denial	Insufficient scientific basis
2008	FDA-2008-P-0580	Public Citizen's Health Research Group	Non-profit	Review issues related to the safety and efficacy of, and ban the use of thiazolidinedione (TZD) or "glitazone" diabetes drug products.	Other	2008-10-30	2011-11-21	1117	FDA has been examining safety and efficacy issues related to glitazone drugs for more than 10 years. As a result, the Agency has approved multiple and significant labeling changes for both rosiglitazone and pioglitazone consistent with many of the requests in the 2000 Petition. Accordingly, your 2000 Petition is granted in part and denied in par but your 2008 Petition to ban TZD completely is den…	Partial Approval and Denial	Insufficient scientific basis
2008	FDA-2008-P-0486	Norman W. Lefkovitz, M.D	Individual	Strengthen its regulation of controlled prescription drugs	Drug	2008-09-04	2013-11-29	1912	Withdrawn because FDA did not receive appropriate response from petitioner in 30 days	Withdrawn
2008	FDA-2008-P-0074	Cornucopia Institute	Non-profit	Take regulatory action to revise the existing regulations by requiring labeling on all infant formula containing the long chain polyunsaturated fatty acids (LCPUFAs) docosahexaenoic acid (DHA) and arachidonic acid (ARA) from algal and fungal sources	Other	2008-01-24	2011-09-28	1343	You have not shown that there are reasonable grounds for the specific labeling requirements you propose and that the proposal is in the public interest and will promote the objectives of the Federal Food, Drug, and Cosmetic Act or FDA.	Denial	Insufficient scientific basis
2008	FDA-2008-P-0219	Buchanan Ingersoll & Rooney PC	Individual	Regulation of tannates in cough/cold medicine and refrain from any categorical regulation of same.	Drug	2008-01-03	2011-03-01	1153	Agency did find that it was in the public interest for effectiveness determinations under DESI to apply to drug products that were either identical or "reasonably related and similar" to the drug products listed in the DESI notices. FDA does not take categorical enforcement actions and seeking enforcement action is not the proper purview of citizen petitions	Denial	Insufficient scientific and legal basis
2008	FDA-2008-P-0291	PRN Publishing	Non-profit	Amend the regulations applicable to prescription drug product labels to require those labels to include the new drug application (NDA) number, as listed in FDA's Approved Drug Products with Therapeutic Equivalence Evaluations (the Orange Book), under which the drug products were produced.	Other	2008-05-06	2012-01-06	1340	Although we support efforts to clearly communicate which prescription drugs are therapeutically equivalent for substitution purposes, we do not agree that the proposed labeling requirement you request would address the issues you identify in the Petition. Petition lacks information to support claims, current regulations are sufficient to protect consumers, and limited agency resources do not warr…	Denial	Insufficient scientific basis
2008	FDA-2008-P-0380	National Association of Chaio Drug Stores	Non-profit	Take a number of actions to consolidate and replace current patient labeling and information distributed in pharmacies about prescription drugs	Other	2008-07-01	2010-11-23	875	Withdrawn	Withdrawn
2007	FDA-2007-P-0009 and FDA-2009-P-0227	National Center on Addition and Substance Abuse (Columbia University)	Non-profit	Promulgate regulations inteded to strength FDA regulation of opoids and other controlled drugs and to help minimize risks of diversion and abuse of such drugs (two related petitions)	Drug	10/25/07; 5/15/09	2013-06-17	2062	We agree that abuse and misuse of many controlled prescription drugs, particularly certain opioids, are pressing public health concerns. We do not agree, however, that we should impose the blanket requirements you propose for all such products, as the benefits and risks, as well as the appropriate response to such risks, can vary significantly from product to product. Instead, we intend to contin…	Denial	Insufficient scientific basis
2007	FDA-2007-P-0110	Physicians Committee for Responsible Medicine	Non-profit	Revise the labeling for all drugs in the thiazolidinedione class to include information that "a low-fat plant-based diet has an efficacy and safety profile that can be as favorable as, or more favorable than, oral medications for managing diabetes"	Drug	2007-12-18	2010-10-21	1038	The information you have submitted does not allow us to conclude that the presence or absence of animal products in a healthy diet has an impact on the management of type 2 diabetes with or without antidiabetic medications. Your requested labeling change is not supported by substantial evidence derived from adequate and well-controlled studies as required by the Act	Denial	Insufficient scientific basis
2007	FDA-2007-P-0122	Compassion over Killing; Penn Law Animal Law Project	Non-profit	Take regulatory action to revise the current labeling requirements for eggs to provide for certain terms related to egg production	Other	2007-02-21	2013-08-28	2380	You do not provide a sufficient basis for the agency to revise the current labeling requirements for shell eggs. Specifically, you have not provided evidence sufficient to show that eggs from caged hens are "nutritionally inferior" to eggs from free- range and cage-free hens. Second, you have not provided sufficient evidence to show that eggs from caged hens have a greater risk of Salmonella cont…	Denial	Insufficient scientific basis
2007	FDA-2007-P-0178	John Edward Erb	Individual	Revoke the generally recognized as safe (GRAS) status of monosodium glutamate (MSG)	Other	2007-12-21	2012-11-08	1784	You cite certain studies in support of your assertion that oral MSG consumption is the cause for certain disorders, such as adult-onset olivopontocerebellar degeneration, amyotrophic lateral sclerosis, thrifty phenotype, and perinatal brain injury. These studies primarily describe metabolic processes involving glutamate that may be involved in the pathology of these conditions. FDA does not agree…	Denial	Insufficient scientific basis
2007	FDA-2007-P-0180	The Alliance Against Alveolar Soft Part Sarcoma and Sarcoma Foundation of America (with lawyer)	Non-profit	Issue a guidance document that explains how a new drug application (NDA) for a drug or biologic license application (BLA) for a biologic intended to treat a rare cancer, such as alveolar soft part sarcoma (ASPS), could meet accelerated approval requirements (Petition at 1).	Drug	2007-10-26	2010-06-28	976	FDA is required to issue guidance based on the committee's recommendations for articles for use in the prevention, diagnosis, and treatment of rare diseases (rare diseases guidance). While this guidance is not specific to rare cancers, we anticipate that it will address broad issues pertaining to all rare diseases, including rare cancers, so no separate guidance is required specifically for rare …	Denial	Insufficient legal basis
2007	FDA-2007-P-0190	Public Citizen's Health Research Group /University of Leiden	Non-profit	Immediately ban third-generation combination oral contraceptives (COCs) containing desogestrel	Drug	2007-02-06	2013-01-11	2166	The epidemiologic studies that you cited to support an increased risk of VTE with the use of desogestrel-containing COC products for contraception have provided conflicting results, and many have methodological limitations that call into question the validity of their findings and conclusions. More recent studies that more carefully adjusted for duration of use have not shown the magnitude of inc…	Denial	Insufficient scientific basis
2007	FDA-2007-P-0232	Coalition for Mercury-free Drugs	Non-profit	Take numerous actions pertaining to vaccines and other FDA-regulated products containing thimerosal or other mercury-based preservatives	Drug	2007-08-10	2008-11-21	469	The studies and other documents on which you rely do not support your argument that FDA should take action against biologics and other drugs that contain thimerosal. Only a small number of licensed and approved products still contain thimerosal, and the available evidence supports FDA's conclusion that all currently licensed vaccines and other pharmaceutical drug products containing thimerosal an…	Denial	Insufficient scientific basis
2007	FDA-2007-P-0234	Terence J Mix	Non-profit	Reconsider its September 8, 2009, response (Original Petition Response) denying your original citizen petition received on November 29, 2007 (OriginalPetition). The Original Petition requested that FDA require certain changes to the labeling for Clomid (clomiphene citrate) and that FDA require risk evaluation and mitigation strategies(REMS) and postmarket studies and/or clinical trials for these …	Drug	2007-11-29	2012-03-08	1561	We conclude that the article provided is not sufficient to cause us to change our Original Petition Response. We find that the study described in the article has limitations for making the inference of a causal relationship between the use of clomiphene citrate and congenital malformations in offspring of mothers who used clomiphene citrate around the time of conception.	Denial	Insufficient scientific basis
2007	FDA-2007-P-0293	David Richardson	Individual	Sanction a third-party, independent scientific analysis of zinc gluconate's effect on human olfactory cilia tissue and, if the Agency agrees that there is a scientific correlation between zinc gluconate and the loss of tasteand smell, remove Zicam Cold Remedy Nasal Gel from the market	Drug	2007-03-05	2012-06-22	1936	Your second request asks that FDA set additional safety standards for the homeopathic industry as a whole. Nothing in the Federal Food, Drug, and Cosmetic Act (the FD&C Act) or the regulations issued under it exempts homeopathic drugs from the new drug approval requirements in section 505(a) of the FD&C Act (21 U.S.C. 355(a)). We do not believe that additional safety standards above and beyond th…	Denial	Insufficient scientific and legal basis
2007	FDA-2007-P-0345	Cooley Godward	Unclear	Withdraw the commercial marketing authorization for oral sodium phosphate (OSP) products for bowel cleansing, or add a black box warning to OSP products regarding the potential risks of renal failure	Other	2007-09-20	2008-12-11	448	After a thorough review of the information submitted and currently available relevant scientific literature, we conclude that there is new safety information regarding acute phosphate nephropathy that supports granting some of your requests. Accordingly, we have notified the NDA holder for prescription OSP products of the requirement to add a boxed warning to the labeling of these products. Howev…	Partial Approval and Denial	Insufficient scientific basis
2007	FDA-2007-P-0346	Richards Sauerheber	Individual	Ban unnaturally synthesized fluoride compounds used in U.S. municipal water districts to fluoridate drinking water	Other	2007-09-25	2010-10-27	1128	We appreciate your concerns about the safety of public water supplies. However, because the EPA, not FDA, has regulatory authority over public water supplies, your petition requesting that FDA ban the use of synthetic fluoride compounds in public drinking water is denied.	Denial	Insufficient legal basis
2007	FDA-2007-P-0401	Public Citizen's Health Research Group	Non-profit	Issue a policy statement requiring that FDA staff make an oral scientific presentation on the products reviewed, including a thorough safety and efficacy assessment, at all of FDA's Center for Drug Evaluation and Research (CDER) advisory committee meetings discussing a specific drug product	Other	2007-06-21	2010-07-16	1121	Our practice is that CDER staff generally should make an appropriate oral scientific presentation at an advisory committee meeting discussing a specific drug product, and in practice such presentations are made at the overwhelming majority of those meetings. We have taken steps to encourage review divisions in the Office of New Drugs to follow this approach as appropriate. However, because we are…	Denial	Insufficient legal basis
2007	FDA-2007-P-0413	Pharmacist Planning Services	Non-profit	Standardize and increase the print size for direct-to-consumer (DTC) advertising of prescription drug products, over-the-counter (OTC) drug products, and herbal products to enhance their readability	Other	2007-02-14	2013-06-10	2308	As you acknowledge in your petition, several factors can affect readability, and no single factor can be determinative. As stated above, we believe that the FD&C Act, the implementing regulations, published guidance, and the availability of comment and advice from FDA provide sufficient and appropriate direction and flexibility for manufacturers to prepare DTC prescription drug brief summary mate…	Denial	Insufficient scientific basis
2007	FDA-2007-P-0118 FDA-2007-P-0066	Thomas J. Quinn	Individual	Strict and immediate enforcement of performance standards contained in: 21 CFR 10.20(g)(h) and 1020.33(c); 21 CFR 1040.10(h); 21 CFR 820.170	Device	2007-08-27	2009-09-08	743	Your first, second, third, and fifth requests ask FDA to enforce certain regulations, and medical device laws generally. Requests for the Agency to initiate enforcement actions are not within the scope of FDA's citizen petition procedures. See 21 CFR 10.30(k). Your fourth request asks the agency to provide a means to calculate the Computed Tomography Dose Index (CTDI), dose profile, and dose meas…	Denial	Insufficient scientific and legal basis
2007	FDA-2007-P-0464	Ralph D. Childs	Individual	Determine "a means to calculate Computed Tomography dosage index, dose profile and dosage measurement for a dual tube CT system	Device	2007-10-03	2009-09-08	706	Same petition as 2007-P-0118; all requests denied	Denial	Insufficient scientific basis
2007	FDA-2007-P-0184	Judy Slome Cohain	Individual	Restore FDA approval to Tecsana Epi-no birth trainer and to remove the adverse event report on Tecsana Epi-No from FDA website	Device	2007-12-12	2008-08-08	240	Your request that FDA "restore'' approval to the Tecsana Epi-no Birth trainer is based in a misunderstanding of the status of the device. A search of FDA's official records does not reveal any valid premarket approval or clearance, or any exemption from applicable requirements of the Federal Food, Drug, and Cosmetic Act (the Act), as amended, for a device known as a Tecsana Epi-No birth trainer. …	Denial	Mistaken fact
2007	FDA-2007-P-0417	Consumer's Union	Non-profit	Require print and electronic advertisements, including Internet advertisements, for implantable devices such as knee, hip, heart valves, cosmetic implants, and other devices	Device	2007-12-17	2010-03-30	834	The information that you requested regarding risk of infection could create the misperception that the device itself presents a risk not present in other surgeries. All surgical procedures carry a risk of infection and this risk depends on a variety of factors such as the health of the patient, the type and location of the surgery, the skill of the surgeon, and postoperative care. In other words,…	Denial	Insufficient scientific basis
2007	FDA-2007-P-0339	Anil K. Mandal, M.D., Medical Specialists	Individual	Prohibit the use of Lovenox (enoxaparin sodium) in patients with acute or chronicrenal failure and in patients over 65 years of age	Drug	2007-08-13	12/17/2010	1222	Despite the lack of the antifactor Xa test, the administration of enoxaparin may be necessary to treat a serious or life-threatening condition. Also, the labeling for enoxaparin already provides information regarding the risks of its use and dosing information in patients with renal insufficiency and elderly patients. The labeling also recommends careful monitoring in patients with renal impairme…	Denial	Insufficient scientific basis
2007	FDA-2007-P-0051	Sidelines National Support Network	Non-profit	request that the Commissioner revoke theorphan-drug designation which was assigned to Adeza Biomedical’s 17 ct-Hydroxyprogesterone caproate’s product.	Drug	2007-10-24	2011-02-03	1198	When a sponsor requests orphan-drug designation for a drug, OOPD will grant such designation unless the requirements for orphan-drug designation are not met. Nor would the orphan-drug designation, or the grant of orphan exclusivity to Hologic for 17-HPC for the prevention of pre-term birth in singleton pregnancies, preclude other sponsors from obtaining orphan designation and NDA approval should …	Denial	Insufficient legal basis
2006	FDA-2006-P-0008	Anil Mandal, M.D.	Individual	Restrict the use of or withdraw from the market angiotensin converting enzyme inhibitor (ACEI) and angiotensin receptor blocker (ARB) drug therapy in certain conditions	Drug	2006-09-06	2010-08-03	1427	We do not believe that these drug products should be removed from the market for safety reasons, nor should they be restricted under the conditions you propose. Available data from large controlled trials demonstrate great benefits for these classes of drugs in preventing mortal and irreversible morbid events, and they do so in patients with the risk conditions you propose as criteria for not usi…	Denial	Insufficient scientific basis
2006	FDA-2006-P-0024	Chemically Associated Neural Disorders	Non-profit	Stay the approval of all Silicone gel-filled breast implants for an indefinite time	Device	2006-04-06	2006-11-17	225	The agency has approved PMAs for these devices because the data submitted in support of each PMA, taken as a whole, provides reasonable assurance of the safety and effectiveness of the devices and, therefore, meets the statutory standard for approval	Denial	Insufficient scientific basis
2006	FDA-2006-P-0075	Michael Patterson	Individual	Place moratoriums on the use of, and rescind the approval of, certain currently approved medical devices used in LASIK procedures	Device	5/17/2006; 12/18/2006	2007-07-20	429	We deny your request for the specified moratoriums, find no basis at this time for withdrawing the existing medical device approvals you discuss in your petitions, and have no authority to interfere in the practice of medicine by state-licensed professionals; we are granting your request to have the panel consider quality of life and outcome issues associated with LASIK and PIOL devices at its ne…	Partial Approval and Denial*	Insufficient scientific and legal basis
2006	FDA-2006-P-0081	Public Citizen's Health Research Grouop	Non-profit	Ban fluoroquinolone anti-infective gatifloxacin because of increased risk of dysglycemia in humans.	Drug	2006-05-01	2008-09-09	862	We grant your petition to remove gatifloxacin from the market because it is already no longer marketed; we deny your petition to withdraw any drug's approval under 505(e) as moot because it is no longer marketed	Partial Approval and Denial*	Moot
2006	FDA-2006-P-0088	Michael Patterson	Individual	Place moratoriums on the use of, and rescind the approval of, certain currently approved medical devices used in LASIK procedures	Device	5/17/06; 12/18/06	2007-07-20	214	Combined response to four separate citizen petitions; see FDA-2006-P-0075	Partial Approval and Denial*	Insufficient scientific basis
2006	FDA-2006-P-0213	International Center for Technology Assessment (ICTA); Friends of the Earth; Greenpeace; Action Group on Erosion, Technology and Concentration; Clean Production Action; the Center for Environmental Health; Our Bodies Ourselves; and the Silicon Valley Toxics Coalition	Non-profit	Take various safety actions, including labeling changes, for OTC Nanotechnology Sunscreen products	Other	2006-05-16	2012-04-20	2166	FDA has carefully reviewed your petition and has determined that it does not provide sufficient data and information to persuade FDA to take the specific actions you requested at this time (other than the reopening of the administrative record for the OTC Sunscreen Monograph). As described below, FDA has already undertaken many steps, and plans further actions, to help ensure the safe use of nano…	Partial Approval and Denial*	Insufficient scientific basis
2006	FDA-2006-P-0266	Maya Perrott	Individual	Change the labeling or remove the psychotropic drug Depakote off the market	Drug	2006-06-15	2006-09-20	97	Your petition does not contain sufficient information about the adverse event that you believe you experienced as a result of Depakote use	Denial	Insufficient scientific basis
2006	FDA-2006-P-0270	Public Citizen's Health Research Group	Non-profit	Withdraw propoxyphene-containing drug products from the U.S. market	Drug	2009-08-06	2010-11-24	475	We have concluded that the weight of evidence has shifted and the overall balance of risk to benefit for propoxyphene is no longer favorable. Today, we announced that we are taking action to remove propoxyphene-containing drug products from the market. Although the agency is taking the action that you requested in your petition, it is doing so on the basis of data and studies that were not part o…	Denial	Moot
2006	FDA-2006-P-0287	Clinical and Laboratory Standards Institute	Non-profit	Consider new or revised criteria advocated by the Clinical Laboratory Standards Institute, and positively review fluconazole disks for disk diffusion susceptibility testing of Candida	Drug	2006-06-21	2007-03-05	257	(1) FDA intends to consider information on alternative susceptibility test interpretive criteria submitted by CLSI through existing processes to request changes to the susceptibility test interpretive criteria in the drug product label. (2) Petition with respect to fluconazole disks is denied, because the agency generally may not discuss or acknowledge any pending application for such a product	Partial Approval and Denial*	Insufficient legal basis
2006	FDA-2006-P-0326	Public Citizen's Health Research Group/Case Western University	Non-profit	Immediately remove Xenical (orlistat) from the market and not approve a new drug application (NDA) for an over-the-counter (OTC) formulation of orlistat.	Drug	2006-04-10	2007-02-07	303	Based upon our review of all of the available evidence (including preclinical data, preapproval clinical studies, data from the sponsor's post-marketing commitment, and post-marketing spontaneous adverse event reporting), we have not found that orlistat is "unsafe for use under the conditions of use upon the basis of which the application was approved"	Denial	Insufficient scientific basis
2006	FDA-2006-P-0335	Center for Food Safety	Non-profit	Take several actions with respect to animal cloning, including for use as food or feed	Other	2006-10-12	2008-01-15	460	We deny your request to issue an interpretive rule to require the regulation of animal cloning and animal clones as new animal drugs. To the extent that animal clones meet the necessary statutory requirements to be regulated as new animal drugs, at this time, FDA intends to exercise its enforcement discretion. We have also concluded, per our final risk assessment, that food from cattle, swine, an…	Denial	Insufficient scientific and legal basis
2006	FDA-2006-P-0347	Michael Patterson same issues in: 1. 2006P-0212, filed May 17,2006 (CP 1) 2. 2006P-0213, filed May 17,2006 (CP 2) 3. 2006P-0518, filed December 18,2006 (CP 3) 4. 2006P-0519, filed December 18,2006 (CP 4)	Individual	LASIK	Device	5/17/06; 12/18/06	2007-07-20	429	In support of your petitions, you cite a number of individual case reports, personal experiences, and third-party testimonials, and you offer informal scientific analysis. You also incorporate by reference various pieces of information obtained from the Internet and other sources that you believe provide a basis for the actions you request. These kinds of incorporation by reference are not accept…	Denial	Insufficient scientific and legal basis
2006	FDA-2006-P-0385	Public Citizen Litigation Group	Non-profit	Open to the public the FDA’s Blood Products Advisory Committee meeting scheduled for Friday, July 14, 2006	Drug	2006-07-14	2006-07-27	13	Withdrawn	Withdrawn
2006	FDA-2006-P-0389	Mary McDole	Individual	Changes be made to the labeling of stimulant medications such as Adderall (amphetaminedextroamphetamine), Concerta (methylphenidate), and Ritalin (methylphenidate)	Drug	2006-11-21	2007-05-25	185	As grounds for your petition, you cite a lack of information on the long-term effects of ADHD drugs on the stomach, kidneys, lungs, heart, brain, circulatory system, and reproduction. Your petition cites an unnamed speaker but does not otherwise provide any references to support your request. Because you have not provided adequate support for your request, your petition is denied	Denial	Insufficient scientific basis
2006	FDA-2006-P0390	Illinois Attorney General; Public Citizen's Health Research Group	Non-profit	Require manufactuers of the fluoroquinolone class of antimicrobial drugs to take the various safety actions	Drug	2005-05-18	2008-07-24	1163	The petitions submitted by the State of Illinois and HRG are granted with respect to the request for referral of fluoroquinolone safety issues to the Drug Safety Oversight Board; granted in par with respect to the request for a boxed warning, related labeling changes, and a Medication Guide; granted in part with respect to the request that we supplement information to patients. However, because w…	Partial Approval and Denial	Insufficient scientific basis
2006	FDA-2006-P-0454	Jerry Staton	Individual	Order the Church of Scientology to disclose the hazards of using E-meter	Device	2006-09-17	2008-02-05	506	Your petition does not provide a basis for a violation of any FDA laws	Denial	Insufficient legal basis
2006	FDA-2006-P-0542	James Maloy	Individual	Recommend changes to requirements for weighing and measuring devices	Device	2006-04-06	2006-07-25	110	Although we agree that allowing pill counting based on weight creates some potential for errors in pill counting, this potential might be reduced through pharmacy compliance with the procedures for the use of prescription scales.	Denial	Insufficient scientific basis
2006	FDA-2006-P-0149	Washington Legal Foundation	Non-profit	Not regulate as medical devices any assays developed by clinical laboratories strictly for their in-house use	Device	2006-10-02	2014-07-31	2859	These devices are within the plain language of the definition in the FDCA	Denial	Insufficient legal basis
2006	FDA-2006-P-0453	John Kulli, MD	Individual	Reformulate central nervous system (CNS) stimulant drugs, such as Ritalin, Adderall, Dexedrine, Focalin, Concerta and others, as well as any generic versions, to inhibit use of these drugs	Drug	2006-08-31	2014-09-18	2940	Although we support and encourage development of abuse-deterrent formulations of all prescription drugs with potential for abuse, including CNS stimulant drugs, we do not believe that a general reformulation requirement for all drugs in this class, as the petition requests, is appropriate at this time. The science of abuse deterrence is relatively new. Both the drug and formulation technologies i…	Denial	Insufficient scientific basis
2006	FDA-2006-P-0018	Wisconsin Dept of Justic	Non-profit	Allow Plan B drug to be sold over-the-counter without age restriction	Drug	2006-05-22	2006-11-21	183	Petition denied, but was challenged in court and overturned	Denial	Insufficient scientific basis
2005	FDA-2005-P-0004	State of Connecticut/Dr. Charles Bennett	Non-profit	Thalomid	Drug	2005-05-04	2006-05-25	386	All requests for labeling changes accepted, request for postmarketing study denied.	Partial Approval and Denial	Insufficient scientific basis
2005	FDA-2005-P-0056	David Lowe	Individual	Remove Adderall and Adderall XR from the market due to the risk of suddenunexplained death in children	Drug	2005-08-12	2006-06-27	319	Withdrawn	Withdrawn
2005	FDA-2005-P-0059	American College of Gastroenterology	Non-profit	Make changes to warning labeling for DIPRIVAN	Drug	2005-06-27	2010-08-11	1871	We conclude that you have not demonstrated that the warning is inappropriate or unwarranted. In fact, we conclude that both components of the warning are appropriate in light of the significant risks associated with propofol, and we further conclude that the warning should help ensure that propofol is used safely. We therefore will not seek to have the warning removed, reduced, or otherwise amend…	Denial	Insufficient scientific basis
2005	FDA-2005-P-0062	US Public Interest Research Group	Non-profit	Prohibit manufacturers from using xylene, toluene, and dibutyl phthalate in nail polish products marketed for children under 14 years of age	Other	2005-11-21	2007-03-06	470	FDA does not have the statutory authority to require pre-market approval of cosmetic products or ingredients, except most color additives	Denial	Insufficient legal basis
2005	FDA-2005-P-0064	Illinois Attorney General/ Public Citizen	Non-profit	Require manufactuers of the fluoroquinolone class of antimicrobial drugs to take the various safety actions	Drug	2005-05-18	2008-07-24	1163	The petitions submitted by the State of Illinois and HRG are granted with respect to the request for referral of fluoroquinolone safety issues to the DSOB; granted in par with respect to the request for a boxed warning, related labeling changes, and a Medication Guide; granted in part with respect to the request that we supplement information to patients; and denied with respect to the request fo…	Partial Approval and Denial	Insufficient scientific basis
2005	FDA-2005-P-0067	Several organizations and individuals	Non-profit	Deny approval of Mentor Corporation's (Mentor) and named Corporation's premarket approval applications (PMAs) for their silicone gel-filled breast implants	Device	2005-05-23	2006-11-17	543	The Mentor and named Corporations marketing applications contain adequate data to support approval.	Denial	Insufficient scientific basis
2005	FDA-2005-P-0121	Ross Baldessarini and Frederick Goodwin, MD	Individual	Determine that lithium is safe and effective reducing the incidence of suicide and suicide attempts in patients with manic-depressive illness, and amend the indications thereof	Drug	2005-09-28	2007-06-15	625	Petitioners have not presented the sort of analysis of primary data and overall analysis of the studies that would be needed to support a new claim. Petitioners provided more than 100 studies, articles, and other references with their request. The Agency can, in some cases, rely on published data for labeling claims, more detail about studies than is usually contained in journals will generally b…	Denial	Insufficient scientific basis
2005	FDA-2005-P-0125	James Salsman	Individual	Request that modafinil be switched from a prescription to an over-the-counter drug	Drug	2005-06-27	2006-12-21	542	You failed to submit sufficient evidence to demonstrate that consumers would be able to self-diagnose their condition and use the drug effectively without a medical diagnosis or supervision by a health care practitioner, evidence that FDA considers for any Rx-to-OTC switch	Denial	Insufficient scientific basis
2005	FDA-2005-P-0130	Roger Salisbury, MD	Individual	Conduct an assessment of Stevens-Johnson Syndrome and toxic epidermal necrolysis associated with ibuprofen, investigate ibuprofen manufacturers for withholding such information, and require labeling changes to reflect these risks	Drug	2005-02-15	2006-06-22	492	SJS and TEN are categorized as "expected" events because they are listed in the current labeling for the drug product. Therefore, manufacturers are required to submit reports they have received of SJS and TEN to FDA annually in periodic reports under § 314.80(c)(2). We have no evidence that manufacturers are not complying with these reporting requirements. Therefore, we see no actionable allegati…	Partial Approval and Denial	Insufficient scientific basis
2005	FDA-2005-P-0136	Public Citizen's Health Research Group	Non-profit	Promulgate a new regulation that enables the FDA to withdraw approval for an approved medical device that has caused patients harm, or that raises a substantial likelihood of causing harm, when another device is on the market that is equally or more effective for the same use, but poses less risk" and to "facilitate a recall of such a problematic device."	Drug	2005-09-14	2011-07-11	2126	There is no per se requirement under the statute for the agency to evaluate the safety of a device that is subject to PMA approval by comparing the device to other similar devices on the market "that may pose less risk." Similarly, with respect to device recalls, there is no such requirement under section 518(e) of the Act (21 U.S.C. 360h(e)) dictating when FDA may find that a reasonable probabil…	Denial	Insufficient legal basis
2005	FDA-2005-P-0151	Public Citizen's Health Research Group	Non-profit	Remove the drug lressa (gefitinib) from the market	Drug	2005-03-04	2012-04-27	2611	AstraZeneca informed FDA in a letter dated February 1, 2011, that it intended to discontinue marketing Iressa and also requested that NDA 21-399 be withdrawn, effective September 30, 2011. Therefore, the petition is denied as moot.	Denial	Moot
2005	FDA-2005-P-0192	Public Citizen's Health Research Group	Non-profit	Requests for a boxed warning, distribution of Medication Guides, distribution of Dear Doctor letters, and establishment of a patient registry for PDE5 Inhibitors	Drug	2005-10-20	2011-11-25	2227	We do not believe that you have demonstrated that the risk of NAION from taking PDE5 inhibitors is serious relative to the established benefits of PDE5 inhibitors or that patient labeling in the form of a Medication Guide is warranted; We believe that the communications described above were sufficient to disseminate information regarding the 2005 labeling changes	Denial	Insufficient scientific basis
2005	FDA-2005-P-0221	UCSF National Center for Excellence in Women's Health	Non-profit	Requests that we revise the labeling for glycoprotein (GP) Ilb/IIIa inhibitors (tirofiban, lamifiban, eptifibatide, and abciximab) to reflect the risk of adverse events (death and myocardial infarction (MI)) when these drugs are used for acute coronary syndrome	Drug	2005-03-06	2013-04-10	2957	We have granted your petition in part because we used the information you provided to discuss and arrive at labeling changes, similar to those you requested, with the holders of the new drug applications (NDA) for eptifibatide and tirofiban. However, we deny your request to revise the labeling for abciximab and lamifiban because (1) Abciximab has been shown to be beneficial in both men and women …	Partial Approval and Denial	Insufficient scientific and legal basis
2005	FDA-2005-P-0256	Public Citizen's Health Research Group	Non-profit	Immediately remove from the market pemoline (Cylert, manufactured by Abbott Laboratories, and all generic versions)	Drug	2005-03-24	2006-05-01	403	The product is no longer being marketed. Accordingly, we do not think such a recall is necessary	Denial	Moot
2005	FDA-2005-P-0261	International Myopia Prevention Association	Non-profit	Require labeling changes for prescription contact lenses	Device	2005-04-28	2006-08-02	461	After thoroughly reviewing the information submitted in your petition, as well as available, relevant scientific evidence, we conclude that the agency's current labeling requirements for prescription eyewear are appropriate and adequate. We also conclude that referral of this issue to an FDA advisory committee is unwarranted at this time	Denial	Insufficient scientific basis
2005	FDA-2005-P-0321	National Institute of Oilseed Products	Non-profit	Regulations for Food Samples	Other	2005-07-01	2009-03-13	1351	Your petition does not present any data or information that would justify FDA in amending the recordkeeping requirements in 21 CFR Part 1, subpart J to exempt food samples that are intended for consumption. As stated, persons who manufacture, process, pack, transport, distribute, receive, hold, or import food in the United States are subject to the establishment and maintenance of records require…	Denial	Insufficient scientific basis
2005	FDA-2005-P-0323	Eric Pritchard	Individual	Request certain changes to the INDICATIONS AND USAGE section of the labeling for levothyroxine sodium drug products	Drug	2010-11-15	2011-08-12	270	We conclude that the data and information submitted in support of the Original Petition and the Reconsideration Petition are not sufficiently persuasive to cause us to modify or overrule the Original Petition Response	Denial	Insufficient scientific basis
2005	FDA-2005-P-0325	Barbara & Kirk Van Rooyan	Individual	Temporarily withdraw the approval of Oxycontin and Palladone until they incorporate anti-abuse features, and that FDA narrow the indications for both drugs	Drug	2005-02-17	2013-09-10	3127	The Agency grants your request to withdraw approval of OxyContin to the extent that the original formulation of OxyContin (NDA 20-553) (original OxyContin) has been voluntarily withdrawn from sale and FDA has determined that it was withdrawn for reasons of safety and effectiveness. The rest of your requests are denied. There is not sufficiently clear evidence from appropriately designed comparati…	Partial Approval and Denial*	Insufficient scientific basis
2005	FDA-2005-P-0432	Public Citizen's Health Reesarch Group	Non-profit	Cox-2 Inhibitors	Drug	2005-01-24	2005-07-26	183	After conducting this analysis, FDA concluded that the risks of continued marketing of Bextra outweigh the benefits, and we asked the sponsor to voluntarily withdraw Bextra from the market. Your petition is, therefore, granted in part. In the case of Celebrex, we concluded that its benefits outweigh its risks in properly selected and informed patients, and we declined to seek its removal from the…	Partial Approval and Denial	Insufficient scientific basis
2005	FDA-2005-P-0261	International Myopia Prevention Association	Non-profit	Investigate and curb the use of prescription distance glasses and contact lenses in children	Device	2005-05-02	2006-08-02	457	As a result of our review, FDA does not believe the material you provide in support of your hypotheses, nor current scientific literature warrants referral of the matter to FDA's Ophthalmic Devices Panel of the Medical Devices Advisory Committee. Some literature, in fact, provides evidence that under-correction of myopia may actually increase its progression. As stated previously, FDA does not ha…	Denial	Insufficient scientific and legal basis
2005	FDA-2005-P-0136	Public Citizen's Health Research Group	Non-profit	FDA to establish tighter regulations governing the process by which Medical Devices are reviewed and recalled	Device	2005-11-10	2011-07-11	2069		qwx2zewz	Insufficient legal basis
2005	FDA-2005-P-0252	Donna Ricks	Individual	Provide the petitioner, Donna Ricks, with access to the drug Palladone (hydromorphone hydrochloride) for relief of severe pain due to terminal cancer.	Drug	2005-09-27	2007-03-27	546	Palladone's sponsor, Purdue Pharma, suspended marketing of Palladone in July 2005. Such requests are generally treated as requests for a single patient Investigational New Drug Application. Petition is moot due to the petitioner's death.	Denial	Petitioner died on January 7,2006.
2005	FDA-2005-P-0462/0465	Consumers for Dental Choice	Non-profit	Request various actions related to mercury in dental products	Other	2005-11-09	2006-10-26	351	We have granted your requests that we convene a panel with expertise in areas other than dentistry on scientific developments and that we provide a transparent forum where all interested parties might share information. However, we are denying the requests that FDA transfer responsibility; however, we believe that the concerns underlying those requests-which appeared to include concerns that a pa…	Partial Approval and Denial*	Insufficient scientific basis
2004	FDA-2004-P-0223 / 0329	Russel J. Thomsen, M.D.	Individual	Allow over-the-counter status for hand-held dopppler fetoscopes	Device	2004-07-26	2005-02-25	214	As we explained in response to your previous petitions, 2002P-0338 and 2003P-0438, your request to permit OTC use of these devices raises significant considerations regarding the safety of exposing a developing fetus to Doppler ultrasound without the order or instructions of a physician. FDA has concluded that additional guidance from outside experts could help the agency better identify and eval…	Denial	Insufficient scientific basis
2004	FDA-2004-P-0100 / 0334	City of Arlington Texas	Government Agency	Clarify whether city may propose installtion of automatic external defibrillators	Device	2004-08-09	2005-03-15	218	FDA concluded that the City of Arlington’s proposed ordinances regarding the use AEDs, if enacted, would not establish any requirements that are different from or in addition to FDA requirements. As a result, the City of Arlington's proposed ordinances would not be preempted by section 521 of the Act.	Answered	N/A
2004	FDA-2004-P-0001	Coalition for Mercury-Free Drugs	Non-profit	Mercury containing vaccines, medicines, foods	Other	2004-08-04	2006-09-26	783	Denied, no CDER letter available.	Denial	Insufficient scientific basis
2004	FDA-2004-P-0005	Beth Rosenshein	Individual	Make changes to labeling for Premarin (conjugated estrogens) tablets	Drug	2004-11-04	2009-01-09	1527	FDA denied request to make changes to the labeling for Premarin (conjugated estrogens) tablets. Under FDA regulations, labeling is revised to include a warning as soon as there is “reasonable evidence of an association of a serious hazard with a drug . . . ” (21 CFR 201.57(e)). We do not agree that the above literature submitted with your petition provides such evidence.	Denial	Insufficient scientific basis
2004	FDA-2004-P-0009	Public Citizen's Health Research Group	Non-profit	Immeidately remove from market Crestor (rosuvastatin)	Drug	2004-03-04	2005-03-05	366	Review of all of the available evidence indicates that Crestor does not pose a risk of muscle toxicity greater than that of other approved statins. With respect to renal toxicity, there is no convincing evidence that Crestor poses a risk of serious renal injury. However, to help ensure the safe and effective use of Crestor, AstraZeneca has revised the labeling to address certain concerns regardin…	Denial	Insufficient scientific basis
2004	FDA-2004-P-0018	Environmental Working Group	Non-profit	FDA to take immediate action to cease the unlawful distribution of misbranded, adulterated, and unlabeled cosmetics including nine specific ingredients.	Other	2004-06-14	2005-09-29	472	Insufficient evidence that nine identified ingredients are not otherwise safe as regulated by the FDA.	Denial	Insufficient scientific basis
2004	FDA-2004-P-0147	Edward O. Odland	Individual	Review the safety of, require warning information for Nutropin Depot Injection, and amend regulations for postmarketing safety-reporting	Drug	2004-01-07	2006-06-01	876	Although we are not requiring Genentech to revise its web site information, partly in response to your citizen Docket No. 2005P-0013/CP1 and SUP1 petition, we are requesting that all rhGH manufacturers make sure that the above information is more clearly stated in the Package Inserts of all approved rhGH products. We currently are considering revisions to the safety reporting requirements under §…	Partial Approval and Denial*	Insufficient scientific basis
2004	FDA-2004-P-0154	Antonio Zamora	Individual	FDA clarify the use of the terms ‘“100% Natural” and “Fat Free” on food product packages by defining the terms	Other	2004-01-07	2005-12-12	705	We have determined hat there are not sufficient grounds to initiate rulemaking to modify our current policy on use of the term “natural” or the current definition of “fat free” as you requested.	Denial	Insufficient scientific basis
2004	FDA-2004-P-0278	Center for Science in the Public Interest	Non-profit	Petition seeking FDA to require restaurants to announce when food contains transfats and partially hydrogenated oils	Other	2004-07-22	2006-12-15	876	As mentioned above, we are denying your request. A citizen petition includes a request to issue, amend, or revoke a regulation or order, or to take or refrain from taking any other form of administrative action (emphasis added) (21 CFR 10.25(a)). An "administrative action," within the meaning of 21 CFR 103, does not include the referral of apparent violations to U.S. attorneys for the institution…	Denial	Insufficient legal basis
2004	FDA-2004-P-0294	Office of the Attorney General, State of Connecticut	Government Agency	Labeling of OxyContin (oxycodone hydrochloride (HCI))	Drug	2004-01-27	2008-09-09	1687	The information you have provided in the form of prescribing information, expert opinions, anecdotal evidence, and your analysis of MedWatch reports fails to support your conclusion that prescribing OxyContin at dosing intervals more frequent than 12h may increase the risk of side effects and serious adverse reactions. You also have not provided sufficient evidence to support your conclusion that…	Denial	Insufficient scientific basis
2004	FDA-2004-P-0295	Robert Wood Johnson University Medical Group	Non-profit	Petition requests that the labeling for estradiol-containing drug products not designate these products as pregnancy category X.	Drug	2004-03-03	2013-11-14	3543	We do not believe that removal of estradiol from pregnancy category X is appropriate at this time as we will address the issue of pregnancy categories in the near future in the context of the pregnancy and lactation labeling rule. As explained, the Agency is currently working to address the pregnancy category system as a whole, and, in particular, the limitations of the pregnancy categories with …	Denial	Insufficient scientific basis
2004	FDA-2004-P-0341	STD Prevention and Control Services, City and County of San Francisco	Non-profit and Government Agency	Amend the product labeling of Viagra; provide information on association between Viagra use and STD transmission; change marketing practices of Viagra; and reclassify Viagra as a controlled substance	Drug	2004-07-12	2006-09-29	809	We deny all your requests for lack of reasonable supporting evidence and because the promotional materials in question meet current FDA regulations.	Denial	Insufficient scientific basis
2004	FDA-2004-P-0365	State of Louisiana Department of Health and Hospitals	Government Agency	Request interpretation of the phrase “pharmacies of hospitals or other health care entities” as used in section 503 of the Act.	Other	2004-01-24	2004-05-17	114	As pharmacies of entities that provide medical treatment, the Louisiana State Office of Mental Health pharmacies are pharmacies of a health care entity for the purposes of section 503 of the Act.	Answered	N/A
2004	FDA-2004-P-0399	Gerald Austin c/o Eva Kasparova	Individual	Compel the enforcement and regulation of amyl nitrite inhalant pursuant to FDA’s regulation at 21 CFR 250.100 as-it relates to specific Internet Web sites	Other	2004-09-08	2006-01-10	489	Denied request for FDA to act immediately to compel the enforcement and regulation of amyl nitrite inhalant pursuant to FDA’s regulation at 21 CFR 250.100 as it relates to specific internet web sites. FDA concludes that the most effective use of Agency resources to target illegal sales of poppers is to educate the public as to their hazards.	Denial	Insufficient scientific basis
2004	FDA-2004-P-0471	Ms. Bunny Abraham	Individual	FDA require expiration dates on food products	Other	2004-10-06	2006-02-07	489	Denied for lack of evidence. You did not provide any data or other information that provides a basis for FDA to require expiration dates on particular food products.	Denial	Insufficient scientific basis
2004	FDA-2004-P-0492	Center for Science in the Public Interest	Non-profit	Define the Terms “Low Carbohydrate,” “Reduced Carbohydrate” and "Carbohydrate Free”	Other	2004-04-09	2014-06-18	3722	Denial may be either by FDA action within the 100-day period, which ends on July 18, 2004 or by a lack of action by FDA within the initial 100-day period in which case the petition shall be deemed to be denied unless an extension is mutually agreed upon by FDA and the petitioner.	Denial	Denial through lack of resolution
2004	FDA-2004-P-0116	The Tatia Oden French Memorial Foundation; Grateful Doula Services (collectively "Foundation Petitions"); American College of Obstetricians and Gynecologists	Non-profit	Regulation of unapproved obstetric uses of Cytotec (misoprostol) for cervical ripening and induction of labor.	Drug	11/23/2004; 11/29/2004; 11/3/2000	2012-11-19	4389	Although we required certain safety labeling changes, we do not believe that the particular changes requested by the petitioners, including either the addition of a contraindication for all uses of the drug in pregnant women (as the Petitions request) or the deletion of all contraindications for its use in pregnancy (as ACOG requests), are appropriate or would lead to improved patient safety. We …	Partial Approval and Denial*	Insufficient scientific basis
2003	FDA-2003-P-0069	Beth Rosenshein	Individual	Modify the test interaction section and labeling of Premarin	Drug	2003-08-01	2004-09-21	417	Your request that the drug/laboratory test interaction section of the labeling for Premarin be modified is effectively granted. Your request that the description section of the labeling for Premarin be modified is denied because the Premarin labeling complies with the current USP monograph in identifying the active ingredients.	Partial Approval and Denial	Insufficient scientific and legal basis
2003	FDA-2003-P-0014 /FDA-2003-P-0291	Tim Milburn, O.D.	Individual	Regulate mail order/inter sales of contact lenses	Device	2003-06-24	2004-06-28	370	Petitioner's concern over mail order/internet company sales of contact lenses without a valid current prescription is better addressed to the FTC, as it is an authority granted to the FTC by the Fairness to Contact Lens Consumers Act (FCLCA, 15 USC 7601-7610)	Denial	Insufficient legal basis
2003	FDA-2003-P-0184 / FDA-2003-P-0438	Russel J. Thomsen, M.D.	Individual	Requesting FDA to reconsider decision on Over-the-counter sales for hand-held doppler fetoscopes	Device	2003-09-08	2004-06-14	280	OTC purchase and use of Doppler fetoscopes by lay users raises new issues of safety and effectiveness because of the potentiality for harmful effect. FDA does not agree with your statement that they are not medical devices. A medical device is defined in relevant part under the Act as "an instrument ... intended for use in the diagnosis of disease or other conditions ...." (21 U.S.C. § 321(h)(2).…	Denial	Insufficient scientific basis
2003	FDA-2003-P-0411	National Organization for Women, Public Citizen's Health Research Group	Non-profit	Refrain from completing the review of silicone gel-filled breast implant premarket approval (PMA)	Device	2003-11-03	2003-12-03	30	On October 14-15, FDA sought input from an advisory committee of outside experts on the data contained in the Inamed PMA during an open public meeting. In a 9 to 6 vote, the Panel recommended approval of the lnamed PMA with conditions. It is important to note that although the advisory committee makes a recommendation to FDA, FDA has the responsibility for making the final decision on the PMA. In…	Denial	Insufficient scientific basis
2003	FDA-2003-P-0164	Bill G. Pierson	Individual	Reconsider decision on petitioner's voluntary Medwatch report (MW4003197)	Device	2003-10-13	2004-04-06	176	FDA has no reason to believe that adverse events are occurring with this device at a rate greater than expected for this type of device; FDA does not believe that relevant information or views contained in your Medwatch report were not previously or not adequately considered.	Denial	Insufficient scientific basis
2003	FDA-2003-P-0336	Public Citizen's Health Research Group	Non-profit	Immediately remove Serzone (nefazodone) from the market because of adverse events associated with the drug	Drug	2003-03-06	2004-06-14	466	The Agency continues to believe that nefazodone provides a potentially important alternative to other antidepressants and that, although there is a risk of liver injury associated with the drug, the incidence of liver failure appears to be low and is adequately addressed through product labeling.	Denial	Insufficient scientific basis
2003	FDA-2003-P-0405	Arthur Joseph Young	Individual	Labeling of drugs that used human embryos	Drug	2003-06-17	2013-11-07	3796	Withdrawn	Withdrawn
2003	FDA-2003-P-0222	Public Citizen's Health Research Group	Non-profit	Refrain from convening the General and Plastic Surgery Devices panel of the Medical Devices Advisory Committee on October 14, 2003 until membership of the committee is published	Device	2003-09-23	2005-01-28	493	On October 3, 2003, FDA posted on its public website the final panel roster for the October 14-15, 2003 meeting of the General and Plastic Surgery Devices Panel of the Medical Devices Advisory Committee. The roster identified all of the panel members, including the acting panel chairperson, voting members, consumer and industry representatives, and the temporary voting members. In light of FDA’s …	Denial	Moot
2003	FDA-2003-P-0340	Robert Sayre, Ramon Fusaro MD	Individual	Amend 21 CFR Part 352 (the monograph for sunscreen drug products for over-the-counter (OTC) human use	Other	2003-02-26	2003-06-16	110	The New Drug Application mechanism is not an appropriate route to market a sunscreen drug product as described in your petition. OTC drug products marketed under approved NDAs are labeled for consumers and do not require the direct supervision of a healthcare professional. In order to establish professional labeling for OTC sunscreen drug products, you or other interested parties must submit the …	Denial	Insufficient scientific and legal basis
2003	FDA-2003-P-0014	The National Contact Lens Enforcement	Non-profit	Express concern over mail order and intemet companies that sell contact lenses to consumers without verification of a valid, current prescription	Device	2003-06-24	2004-06-28	370	Because Congress has considered the precise issue raised by your petition, and has carefully delineated FTC’s authority to address this issue, we have determined that your concerns are most appropriately addressed to FTC, rather than FDA. Accordingly, we are denying your petition.	Denial	Insufficient legal basis
2003	FDA-2003-P-0278	Committee for Truth in Psychiatry	Non-profit	Maintain electroconvulsive therapy device (882.5849) in Class III Electroconvulsive therapy device	Device	2003-12-10	2004-09-03	268	After carefully reviewing all relevant information, we have concluded that the agency has no plans to reclassify the electroconvulsive therapy device at this time.	Denial	Insufficient scientific basis
2003	FDA-2003-P-0184	Russel J. Thomsen, MD	Individual	Make hand-held Doppler fetoscope available over-the-counter	Device	2003-09-08	2004-06-14	280	The agency believes that professional healthcare providers should determine when circumstances indicate hand-held acoustic ultrasound devices may contribute to helping patients properly monitor the progress of their pregnancies. The prescription status of these products ensures that patients will have professional guidance to use these devices, as appropriate, to contribute to the wellbeing of th…	Denial	Insufficient scientific basis
2002	FDA-2002-P-0079	Russell J. Thomsen, M.D.	Individual	Allow over-the-counter sales for hand-held Doppler Fetoscopes	Device	2002-07-29	2003-06-19	325	Denied, Over-the-counter sales for hand-held Doppler fetoscopes may not be safe when not used by licensed practitioners	Denial	Insufficient scientific basis
2002	FDA-2002-P-0437	Richard Strolworthy	Individual	To amend the FDA 510(k) policy to include disclosure and labeling requirements	Device	2002-10-08	2003-04-16	190	The Agency considers that the FDA 510(k) requirements as stated are sufficient to protect consumers	Denial	Insufficient scientific and legal basis
2002	FDA-2002-P-0004	James H. Schafer, D.V.M.	Individual	Revise 1996 Bioequivalence Guidance	Other	2002-11-15	2003-12-31	411	Given the state of our current scientific framework, including the aforementioned limitations for animal drugs, FDA continues to work within the domain of average bioequivalence concepts and the bioequivalence criteria of 80 to 125%. But we agree that additional work is needed to develop metrics applicable to those situations when the reference product would be unable to be demonstrated as bioequ…	Denial	Insufficient scientific basis
2002	FDA-2002-P-0041	Emord and Associates, P.C (on behalf of Doctor Kyl Smith).	Non-profit	Allow claim that phosphatidylserine reduces risks of dementia and conitive dysfunction	Other	2003-12-03	2004-11-23	356	Based on the agency’s reanalysis of the credible intervention studies relevant to the relationship between phosphatidylserine and dementia and cognitive dysfunction, FDA continues to believe that the science provides very limited and preliminary evidence sufficient for qualified health claims about phosphatidylserine and reduced risk of these conditions.	Denial	Insufficient scientific basis
2002	FDA-2002-P-0044	Carrick Law Group (for American Environmental Safety Institute)	Non-profit	Amend the standards of identity of cacao products to contain no more than 0.02 parts-per-million oflead and 0.02 parts-per-million of cadmium	Other	2002-05-07	2006-04-12	1436	FDA does not believe that amending the standards of identity for cacao products to establish the maximum permitted levels of lead and cadmium is the most appropriate or effective means to achieve this goal of reducing contaminants in foods, including potential contamination of lead and cadmium in chocolate and related products	Denial	Insufficient scientific and legal basis
2002	FDA-2002-P-0072	Emord & Associates (for Julian M. Whitaker, M.D.)	Individual	Require the labeling of all approved statins to include a boxed warning that refer to as risks associated with statin-induced deficiency of CoQ10 and recommends CoQ10 supplementation with all statins.	Drug	2002-05-24	2005-03-04	1015	The boxed warning that you request is not warranted because the currently available, scientific evidence does not support the inclusion of that information under the applicable legal standard.	Denial	Insufficient scientific basis
2002	FDA-2002-P-0074	Public Citizen's Health Research Group	Non-profit	Immediately remove Arava from the market because of adverse events associated with this drug.	Drug	2002-03-28	2003-03-24	361	On the basis of this review, we have determined that, on the whole, these data do not demonstrate that Arava presents a risk of serious hepatotoxicity or other toxicity severe enough, or that it is insufficiently effective, to justify removing this drug from the market.	Denial	Insufficient scientific basis
2002	FDA-2002-P-0081	Zuckerman Spaeder LLP; National Center for Tobacco-Free Kids, Inc.; Ropes & Gray (for American Cancer Society, AMA, American Heart Assn., et al)	Non-profit	Classify and regulate Ariva (a "cigalett" made of compressed powdered tobacco, mint flavorings, and other ingredient) either as a "drug" or a "food"	Drug	2001-12-18	2003-08-29	619	FDA has determined Ariva meets the definition of smokeless tobacco and is a "customarily marketed" tobacco product within the meaning of Brown & Williamson, 529 U.S. 120 (2000), a ruling which excludes such tobacco products from FDA's jurisdiction.	Denial	Insufficient legal basis
2002	FDA-2002-P-0126	Public Citizen's Health Research Group	Non-profit	Remove Meridia (sibutramine) from the market because of adlverse events associated with the drug	Drug	2002-03-19	2005-08-11	1241	Based on a reassessment of the original drug review process, an evaluation of data from AERS, and recently published studies, we continue to believe that sibutramine’s overall risk-benefit profile supports it remaining available as a prescription drug for the treatment of appropriately selected obese patients.	Denial	Insufficient scientific basis
2002	FDA-2002-P-0212	Gene Koprowski	Individual	Investigate the “misbranding” campaigns of third party groups, including the National Abortion Federation (NAF), Planned Parenthood, and other groups whose members benefit from the sale of RU-486 (mifepristone) and other extraordinary relief.	Drug	2002-04-17	2003-05-28	406	Act does not apply to third party groups undertaking advertising campaigns independent of a manufacturer, packer, or distributor of a drug. FDA does not have authority or jurisdiction to address other claims for extraordinary relief.	Denial	Insufficient legal basis
2002	FDA-2002-P-0246	Avishalom Klaininer	Individual	Require "CLEAR, LEGIBLE and INTELLIGIBLE" expiration dates on all food products	Other	2002-04-05	2006-12-15	1715	You have not shown that there are reasonable grounds for the specific labeling requirements you propose or that those specific labeling requirements are in the public interest and will promote the objectives of the Federal Food, Drug, and Cosmetic Act or FDA. See 21 CFR 10.40(a)(2).	Denial	Insufficient scientific basis
2002	FDA-2002-P-0294	Physicians Committee for Responsible Medicine	Non-profit	Mandate the inclusion of new advisories in the product labeling and labeling intended for patients for all products containing estrogens intended for oral use.	Drug	2002-05-02	2003-11-07	554	FDA would consider data showing new and previously unreported adverse events or a significantly higher rate of known adverse events in adolescent females treated with estrogen to reduce final height. The articles in your petition and the other available literature do not identify such data.	Denial	Insufficient scientific basis
2002	FDA-2002-P-0295	Society for Research on Nicotine and Tobacco	Non-profit	Regulate Nicotine Water	Other	2002-04-23	2002-08-07	106	Previously ruled that Nicotine Water is an unapproved new drug under the Act and cannot be marketed as a dietary supplement (as claimed by the manufacturer). We also stated that we would notify the manufacturers of Nicotine Water (and Nice Water) that the product cannot be marketed without FDA approval. See Zuckerman Spaeder LLP and the National Center for Tobacco-Free Kids, Inc. (FDA docket numb…	Denial	Moot
2002	FDA-2002-P-0517	Mr. Arthur Blank	Individual	Issue regulations for the labeling of sports and energy beverages	Other	2002-04-07	2009-02-10	2501	In the absence of required data or information, you have not shown that there are reasonable grounds for the specific labeling requirements you propose or that those specific labeling requirements are in the public interest and will promote the objectives of the Federal Food, Drug, and Cosmetic Act or FDA	Denial	Insufficient scientific basis
2002	FDA-2002-P-0247	Mrs. Betty Martini	Individual	to recall the neurotoxic drug, aspartame	Other	2002-06-15	2014-10-02	4492	FDA concludes that your petition contains no substantive scientific evidence demonstrating that aspartame's use presents a public health risk or that this sweetener is adulterated or misbranded under the Act. Moreover, the comments received in response to your citizen petition did not provide any information that has not previously been considered. Therefore, FDA is not aware of any scientific ev…	Denial	Insufficient scientific basis
2001	FDA-2001-P-0119	Russell Dingle	Individual	Issue the Placement of Anthrax Vaccine as Category II	Drug	2001-10-12	2002-08-28	320	We agree that the FDA should complete the Biologics Review for anthrax vaccine by issuing a final rule. We deny your request to declare all anthrax vaccine in “private, public, U.S., or foreign government possession” to be adulterated. Furthermore, FDA Compliance Policy Guide 400.200 does not require or authorize FDA to take the actions you request. Finally, we do not agree to revoke the license …	Partial Approval and Denial*	Insufficient scientific and legal basis
2001	FDA-2001-P-0122	Ruth Armstrong	Individual	Require that the presence of methylcellulose and carrageenan in food be declared on menus in restaurants, and on trains and airplanes, and require that the ingredients “methylcellulose” and “carrageenan” be declared as such	Other	2001-01-19	2004-08-20	1309	You did not provide data to support your position that consumption of foods containing methylcellulose or carrageenan results in adverse reactions. From the anecdotal information provided in your petition, we were unable to conclusively determine that the adverse reactions you experienced after eating certain foods are due to the ingredients, methylcellulose or carrageenan.	Denial	Insufficient scientific basis
2001	FDA-2001-P-0153	Heather Brodie Perry	Individual	Revoke its regulations listing FD&C Yellow No. 5 for use in foods and drugs because FD&C Yellow No. 5 does not meet FDA's safety standards.	Other	2001-08-03	2010-03-15	3146	FDA has addressed in detail the allergic-type reactions attributed to the consumption of FD&C Yellow No. 5. Therefore, we conclude that your petition and the comments submitted in support thereof contain no new, previously unrecognized adverse reactions supported by scientific evidence that would justify revoking the regulations for FD&C Yellow No. 5.	Denial	Insufficient scientific basis
2001	FDA-2001-P-0157	National Center for Tobacco Free Kids (and lawyers)	Non-profit	Request classifying Ariva as a drug and regulating it as such; classify and regulate Ariva as a food containing an unapproved food additive	Other	2001-12-18	2003-08-29	619	Based on the evidence provided by the petitioners, FDA has determined that Ariva meets the definition of "smokeless tobacco" because it is made of powdered tobacco "intended to be placed in the oral cavity.” Moreover, FDA believes that, based on the information available to it at this time, it is precluded from asserting jurisdiction over Ariva as currently marketed because it is a "customarily m…	Denial	Insufficient legal basis
2001	FDA-2001-P-0190	Washington Legal Foundation	Non-profit	Review all rules struck down or invalidated by the courts	Other	2001-07-05	2002-01-08	187	Although your petition did not identify any specific FDA regulation as being invalid as a result of a court decision, we have already begun a review of past litigation and agency regulations to determine whether any recent court decisions have called into question an existing or pending regulation or guidance document. We also invite you to bring such regulations to our attention so that we may d…	Partial Approval and Denial*	Insufficient factual basis
2001	FDA-2001-P-0214	Veigh Hogan	Individual	Issue guidance regarding installation of magnification devices at retail outlets	Other	2001-04-02	2002-12-18	625	Withdrawn	Withdrawn
2001	FDA-2001-P-0283	Public Citizen's Health Research Group	Non-profit	Require the labeling for all HMG-CoA reductase inhibitors or statins marketed in the United States to carry a black box warning and additional bolded warnings concerning the risk of rhabdomyolysis	Drug	2001-08-20	2014-06-02	4669	As a class, statins have been shown to lower cholesterol, which can reduce the risk of cardiovascular mortality and morbidity. In summary, we believe that the relatively rare adverse events of myopathy and rhabdomyolysis are well known. We therefore deny your requests for boxed warnings, distribution of Medication Guides, and a Dear Health Care Provider letter regarding the risk of rhabdomyolysis…	Partial Approval and Denial*	Insufficient scientific basis
2001	FDA-2001-P-0294	Public Citizen's Health Research Group	Non-profit	Requesting that the Food and Drug Administration (FDA) ban human cadaveric duramater as an unsafe medical device.	Other	2001-08-15	2002-02-11	180	The information cited in your petition, with the exception of the 1998 patient death, was known and fully discussed at an October 6 and 7, 1997, TSEAC meeting. Although your petition asserts that FDA regulation is inadequate, you provide no new types of information on which to base a change in FDA's current regulatory initiatives in this area.	Denial	Insufficient scientific basis
2001	FDA-2001-P-0321	Washington Legal Foundation	Non-profit	Adopt a rule, policy, or guidance stating that information presented or available on a company's Internet website, including hyperlinks to other third party sites, does not constitute 'labeling,' as defined by the Federal Food, Drug, and Cosmetic Act (FDCA) at 21 U.S.C. § 321(m}.	Other	2001-04-16	2001-11-01	199	FDA believes that, in certain circumstances, information about FDA regulated products that is disseminated over the Internet by, or on behalf of, a regulated company can meet the definition of labeling in section 201(m) of the FDCA. For example, if a company were to promote a regulated product on its website and allow consumers to purchase the product directly from the website, the website is lik…	Denial	Insufficient legal basis
2001	FDA-2001-P-0483	Center for Food Safety	Non-profit	Request that FDA impose a moratorium on the domestic marketing, importation, and exportation of transgenic fish	Other	2001-05-11	2009-01-15	2806	Since submission of your petition, FDA released a final guidance, Regulation of Genetically Engineered Animals Containing Heritable recombinant DNA Constructs (GE animal guidance), describing how the new animal drug provisions of the FFDCA and its implementing regulations apply to transgenic animals (which the guidance refers to as genetically engineered or GE animals), including transgenic fish.…	Denial	Insufficient scientific basis
2005	FDA-2005-P-0199	Natural Solutions Foundation	Non-profit	Harmonization policy (US Codex Delegation; US Policy in Harmony with DSHEA)	Other	2005-10-20		3391		Pending
2005	FDA-2005-P-0258	Rutgers (Susan Lehman Cancer Center)	Non-profit	Permit the addition of calcium to enriched grain products	Other	2005-07-07		3496		Pending
2005	FDA-2005-P-0260	Ed Groves	Individual	Specificy whether fluoride was added in bottled water	Other	2005-01-18		3666		Pending
2005	FDA-2005-P-0433	City of Allentown Bureau of Health	Non-profit	Amend its regulations governing the labeling of milk	Other	2005-05-31		3533		Pending
2013	FDA-2013-P-0711	Allergy & Asthma Network Mothers of Asthmatics	Non-profit	Rx/OTC Asthma and Anaphylaxis Medications	Drug	2013-06-13		598		Pending
2013	FDA-2013-P-0703	Center for Lawful Access and Abuse Deterrence	Non-profit	Abuse-Deterrent Opioids	Drug	2013-06-11		600		Pending
2013	FDA-2013-P-0695	Steven A. Zecola	Individual	Metastatic Cancer	Drug	2013-06-06		605		Pending
2013	FDA-2013-P-0693	Center for Medicine in the Public Interest	Non-profit	TREANDA (bendamustine) for Injection	Drug	2013-06-07		604		Pending
2013	FDA-2013-P-0522	Escher Fund for Autism	Non-profit	DICLEGIS (doxylamine succinate and pyridoxine hydrochloride) Delayed-release Tablets	Drug	2013-04-30		642		Pending
2013	FDA-2013-P-0380	Univ of Florida College of Medicine/UNC School of Medicine	Non-profit	Medroxyprogesterone Acetate	Drug	2013-04-02		670		Pending
2013	FDA-2013-P-0351	Center for Food Safety & Institute for Agriculture and Trade Policy	Non-profit	Antibiotics in Food-Producing Animals	Drug	2013-03-15		688		Pending
2013	FDA-2013-P-0298	Yale University	Non-profit	Metformin	Drug	2013-03-12		691		Pending
2013	FDA-2013-P-0048	James P Reichmann	Individual	ZOFRAN (ondansetron)	Drug	2013-01-07		755		Pending
2013	FDA-2013-P-0228	Douglas Barasatian	Individual	Bleached White Flour GRAS Status	Other	2013-02-21		710		Pending
2013	FDA-2013-P-0217	Center for Science in the Public Interest	Non-profit	Added Sugars/High-Fructose Corn Syrup	Other	2013-02-20		711		Pending
2013	FDA-2013-P-0047	American Heart Association	Non-profit	Raw fruits & vegetables; Single-ingredient or mixtures of frozen or canned fruits and vegetables	Other	2013-01-09		753		Pending
2013	FDA-2013-P-0472	Richard C. Theuer, Ph.D.	Individual	GRAS Status of Carrageenan	Other	2013-04-19		653		Pending
2013	FDA-2013-P-0291	Fukushima Fallout Awareness Network (Citizens for Health)	Non-profit	Cesium 134 and Cesium 137 contamination	Other	2013-03-12		691		Pending
2013	FDA-2013-P-0615	State of California Department of Consumer Affairs	Non-profit	Hearing Aid Dispensers	Device	2012-06-04		972		Pending
2013	FDA-2013-P-0199	Richard M. Karcich	Individual	Software Validation	Device	2013-02-15		716		Pending
2013	FDA-2013-P-0435	Tobacco Control Legal Consortium, et al	Non-profit	Prohibit Menthol as a Characterizing Flavor in Cigarettes	Other	2013-04-12		660		Pending
2013	FDA-2013-P-0285	New York City Department of Health & Mental Hygiene, et. al.	Non-profit	Tobacco Products - Track and Trace System	Other	2013-03-11		692		Pending
2013	FDA-2013-P-0776	Biotechnology Information Institute	Non-profit	Request to assign both unique andbiosimilar/(bio)generic-type (or class) names/identifiers for approved biologic products andtheir active agents, along with disclosures of sufficient public information to enable anadequate understanding of product identity, what the products/agents are.	Other	2013-06-21		590		Pending
2012	FDA-2012-P-0146	Center for Science in the Public Interest	Non-profit	Request to take regulatory action to establish a performance standard of non-detectable levels for vivrio vulnificus in moluscan shellfish.	Other	2012-02-09		1088		Pending
2012	FDA-2012-P-0275	William H. Lamont	Individual	Discontinue the present use of bases for environmental considerations that are improper extensions specifically of (1) the current regulations at 21 CFR 25.32(i), and (2) the current general regulations at 21 CFR part 25, subpart B	Other	2012-03-16		1052		Pending
2012	FDA-2012-P-0379	Dr. David Behar	Individual	Require certain labeling and other changes to the labeling of clozapine to provide a means for patients suffering from treatment-resistant schizophrenia who also have benign ethnic neutropenia to be treated with clozapine.	Other	2012-04-16		1021		Pending
2012	FDA-2012-P-0493	Leroy Leslie Hamilton, Ph. D.	Individual	Reclassify Cranial Electrotherapy Stimulator from Class Ill to Class II	Device	2012-05-16		991		Pending
2012	FDA-2012-P-0904	Citizens for Health	Non-profit	Take action to protect the public from the illegal, mislabeled use of high fructose corn syrup containing fructose amounts above 55 percent and (2) require the labeling of high fructose corn syrup to include the fructose percentage.	Other	2012-08-15		900		Pending
2012	FDA-2012-P-0909	Michael D. Lorton, M.D.	Individual	Assert the right of the United States to use, or to authorize the use of, the production processes used to make all reference monoclonal antibody products approved under the Public Health Service Act.	Other	2012-08-16		899		Pending
2012	FDA-2012-P-0963	Charles J. Zimmer	Individual	Take regulatory and administrative action regarding the manufacture and use of Blood Nutrition Software, specifically such software recommending complementary and alternative medicine therapy (CAM) based on interpreted blood test results.	Device	2012-08-31		884		Pending
2012	FDA-2012-P-1007	Public Citizen Litigation Group	Non-profit	Revoke its "minor deletions" policy in responding to Freedom of Information Act requests.	Other	2012-09-19		865		Pending
2012	FDA-2012-P-1053	Public Citizen	Non-profit	Add a black box warning on the labels of all angiotensin-converting enzyme inhibitors (ACEls), angiotensin II receptor blockers (ARBs), and aliskiren, indicating that taking these drugs together, in any combination, increases the risks of potentially life-threatening side effects without any added health benefit over individual use of the drugs.	Drug	2012-10-10		844		Pending
2012	FDA-2012-P-1158	Ms. Milagros Demier	Individual	Request denial of Genetically Modified Mosquitoes experiment in Key West, Florida.	Other	2012-11-21		802		Pending
2012	FDA-2012-P-1179	Jack M. Saroyan, DDS	Individual	Request that a regulation be issued to permit the addition of potassium fluoride to iodized salt for the prevention of Iodine Deficiency Disease and dental caries.	Other	2012-11-29		794		Pending
2012	FDA-2012-P-1252	Animal Legal Defense Fund; Center for Food Safety	Non-profit	Numerous requests concerning Codex standards for ractopamine	Other	2012-12-20		773		Pending
2012	FDA-2012-P-1052	New York Presbyterian Hospital, Weill-Cornell	Non-profit	Eliminate the Boxed Warning regarding Lactic Acidosis associated with metformin; relax the Contraindication against metformin use in renal impairment so that the contraindication does not apply to patients with a creatinine clearance greater than 30 milliliters/minute (mL/min); revise the Precautions section to emphasize close monitoring of renal function rather than strict avoidance of metfonnin…	Other	10/9/2012; Supp. 11/9/2012		845		Pending
2011	FDA-2011-P-0407	Center for Science in the Public Interest	Non-profit	Revoke use of caramel produced by the ammonia or ammonia-sulfite process because of the impurities 2-methylimidazole (2-MEI) and 4-MEI.	Other	2012-03-05		1063		Pending
2011	FDA-2011-P-0018	Dwayne A. Ratleff	Individual	Request new rules to regulate the use of electronic versions of ingredient list and nutrition facts labels	Other	2011-01-03		1490		Pending
2011	FDA-2011-P-0151	Brian C. Mandingo	Individual	Take enforcement action against the Church of Scientology and its affiliated entities for their unsanctioned use ofthe "E-Meter"	Other	2011-03-08		1426		Pending
2011	FDA-2011-P-0276	Environmental Working Group	Non-profit	Investigate business practices, and require labels for hair-straighteners that contain formaldehyde	Other	2011-04-12		1391		Pending
2011	FDA-2011-P-0331	Public Citizen Health Research Group	Non-profit	Ban the use of cornstarch powder on all surgical and examination gloves	Other	2011-05-02		1371		Pending
2011	FDA-2011-P-0356	Center for Tobacco Regulation, University of Maryland School of Law	Non-profit	Assert jurisdiction over cigars and subject cigars to certain sales and distribution regulations that apply to cigarettes and smokeless taboccao under the Family Smoking Prevention and Tobacco Control Act.	Other	2011-05-10		1363		Pending
2011	FDA-2011-P-0437	Cancer Action NY	Non-profit	Immdiately publish and disseminate a persistent organic pollutants health hazard advisory	Other	2011-05-19		1354		Pending
2011	FDA-2011-P-0448	Earthjustice	Non-profit	AquAdvantage Salmon	Other	2011-06-01		1341		Pending
2011	FDA-2011-P-0458	Personal Care Products Council	Non-profit	Lead levels in cosmetics	Other	2011-06-08		1334		Pending
2011	FDA-2011-P-0537	Earthjustice	Non-profit	seafood containing elevated levels of methylmercury	Other	2011-07-05		1307		Pending
2011	FDA-2011-P-0331	Michael A. Carome, M.D., Public Citizen Health Research Group	Non-profit	Ban Cornstarch Powder on Medical Gloves & Ban Use of All Natural Latex Rubber Medical Gloves	Device	2011-05-02		1371		Pending
2011	FDA-2011-P-0479	Dr. S. Albert Edwards	Individual	Request to Investigate Placement of Annuloplasty Rings & Number of Deaths from Annuloplasty Rings for Past 5 Years	Device	2011-06-14		1328		Pending
2011	FDA-2011-P-0590	Kim Witczak and William K. Vaughan	Individual	Request Administrative Action to Improve Involvement of Patients & Consumers in Reporting of Adverse Drug and Device Events	Device	2011-08-10		1271		Pending
2011	FDA-2011-P-0820	G. Scott Crowther, PE	Individual	Reconsider Dose of Mercury Released From Dental Amalgam and Ban Dental Amalgam and Its Components	Device	2011-11-09		1180		Pending
2010	FDA-2010-P-0081	Truth in Labeling Coalition	Non-profit	Review a section of the Statement for Policy: Foods Derived from New Plant Varieties that states "VI Labeling ... The agency is not aware of any information showing that foods derived by these new methods differ from other foods in any meaningful or uniform way, or that, as a class, foods developed by the new techniques present any different or greater safety concerns than foods developed by trad…	Other	2010-01-12		1846		Pending
2010	FDA-2010-P-0045	Richard F . Edlich, MD, PhD, Biomedical Engineering and Emergency Medicine, University of Virinia Health System	Individual	Remove the consumer report "Medical Glove Powder Report" from the FDA website	Device	2010-01-19		1839		Pending
2010	FDA-2010-P-0050	Public Citizen	Non-profit	Remove from the market the drug Savella (milnacipran) on the grounds that it has questionable clinical efficacy and carries potentially serious risks.	Drug	2010-01-20		1838		Pending
2010	FDA-2010-P-0052	Richard F . Edlich, MD, PhD, Biomedical Engineering and Emergency Medicine, University of Virinia Health System	Individual	Remove cornstarch powder from medical gloves because it promotes the growth of cancer,.	Device	2010-01-14		1844		Pending
2010	FDA-2010-P-0056	Richard F . Edlich, MD, PhD, Biomedical Engineering and Emergency Medicine, University of Virinia Health System	Individual	Prepare informed consent dental restorations	Device	2010-01-14		1844		Pending
2010	FDA-2010-P-0091	Emily Robin, et al.	Individual	Requesting Changes in Benzodiazepine Labeling	Drug	2010-02-16		1811		Pending
2010	FDA-2010-P-0093	Joel L. Nitzkin, MD, MPH, DPA, Tobacco Control Task Force, American Association of Public Health Physicians (AAPHP)	Individual	Reclassification of E-cigarettes or electronic cigarettes	Device	2010-02-17		1810		Pending
2010	FDA-2010-P-0095	Joel L. Nitzkin, MD, MPH, DPA, Tobacco Control Task Force, American Association of Public Health Physicians (AAPHP)	Individual	Reclassification of E-cigarettes or electronic cigarettes from "drug-device combination" to "tobacco product"	Device	2010-02-17		1810		Pending
2010	FDA-2010-P-0651	Natural Solutions Foundation	Non-profit	A number of issues related to influenza vaccines ahd request that FDA take a variety of actions to address these issues.	Drug	2010-12-22		1502		Pending
2010	FDA-2010-P-0150	United States Pharmacopeial Convention	Non-profit	Amend the regulations in 21 CFR Parts 170 and 184 to incorporate by reference the Food Chemicals Codex 7th Edition	Other	2010-03-15		1784		Pending
2010	FDA-2010-P-0352	Dr. Richard Edlich Distinguished Professor Emeritus of Plastic Surgery Engineering and Emergency Medicine University of Virginia Health System	Individual	Revise the device classification of cornstarch powdered examination and surgical gloves	Device	2010-06-30		1677		Pending
2010	FDA-2010-P-0392	Dr. Richard Edlich Distinguished Professor Emeritus of Plastic Surgery Engineering and Emergency Medicine University of Virginia Health System	Individual	Ban cornstarch powder on all surgical and examination gloves	Device	2010-07-15		1662		Pending
2010	FDA-2010-P-0397	Dr. Richard Edlich Distinguished Professor Emeritus of Plastic Surgery Engineering and Emergency Medicine University of Virginia Health System	Individual	Ban the use of cornstarch powder in surgical gloves in In Vitro	Device	2010-07-22		1655		Pending
2010	FDA-2010-P-0489	Richard F. Edlich, M.D., Ph.D. University of Virginia Health System	Individual	Establish Citizen Petition guidelines for the FDA so that the decision is announced to the author of the Petition and the public as well as implemented in a timely manner.	Other	2010-09-14		1601		Pending
2010	FDA-2010-P-0504	The GMA Nut Safety Task Force	Non-profit	Develop guidance for industry on controlling Salmonella and other food safety hazards in peanuts and tree nuts.	Other	2010-09-21		1594		Pending
2010	FDA-2010-P-0610	Dr. Richard Edlich, MD, PhD Distinguished Professor University of Virginia Health Systems	Individual	revise the device classification of dental restorative materials and liquid mercury	Device	2010-11-23		1531		Pending
2010	FDA-2010-P-0617	Dr. Richard Edlich, MD, PhD Distinguished Professor University of Virginia Health Systems	Individual	Ban mercury amalgam because it can precipitate the development of severe diseases	Device	2010-11-24		1530		Pending
2010	FDA-2010-P-0619	Dr. Richard Edlich, MD, PhD Distinguished Professor University of Virginia Health Systems	Individual	Ban mercury (Hg) amalgam because it has documented adverse effects on the pregnant woman and fetus	Device	2010-11-29		1525		Pending
2010	FDA-2010-P-0641	Washington Action for Safe Water	Non-profit	Take action against manufacturers of unapproved and misbranded fluoridated water	Other	2010-11-20		1534		Pending
2010	FDA-2010-P-0652	Timothy Demitri Brown	Individual	Repeal and/or revoke a regulation of 21 U.S.C. § 379a and any corresponding CFR statute.	Other	2010-12-27		1497		Pending
2009	FDA-2009-P-0094	American Association for Health Freedom	Non-profit	Consider the potential risks of exposure to Bisphenol-A for dental application	Drug	2009-02-18		2174		Pending
2009	FDA-2009-P-0122	K Paul Stoller, MD FACM	Individual	To recall all vaccines that contain ingredients that have not been shown to be safe	Other	2009-02-27		2165		Pending
2009	FDA-2009-P-0252	Tufts Health Care Institute Program on Opioid Risk Management	Non-profit	Publish a Guidance for Industry and take certain other steps to promote the development of abuse-deterrent formulations of opioid analgesics	Drug	2009-05-27		2076		Pending
2009	FDA-2009-P-0418	Natural Solutions Foundation	Non-profit	Take a variety of actions to address issues related to the influenza vaccine	Drug	2010-12-22		1502		Pending
2009	FDA-2009-P-0518	William A. Green; Mounir Birrou	Non-profit	Amend the Skin Protectant Drug Products for Over the-Counter Human Use; Astringent Drug Products; Final Monograph (21 CFR 347.12(b)) to include additional dosage delivery devices such as single use, sanitary, disposable applicators to prevent cross-contamination of the OTC product and subsequent transfer of blood-borne pathogens from person to person	Other	2009-10-15		1935		Pending
2009	FDA-2009-P-0147	International Dairy Foods Association ("IDEA") and National Milk Producers Federation ("NMPF")	Non-profit	Amend the milk and milk product standards to permit any safe and suitable sweeteners.	Other	2009-03-16		2148		Pending
2009	FDA-2009-P-0405	Food Animal Concerns Trust	Non-profit	Declare poultry litter to be a food additive and to ban its use as a feed for cattle	Other	2009-08-21		1990		Pending
2008	FDA-2008-P-0531	University of Virginia Health System	Non-profit	Petition to Ban Cornstarch Powder on Medical Gloves	Device	2008-10-02		2313		Pending
2008	FDA-2008-P-0585	Elliot Farber	Individual	Reclassify artificial eyes lubricant from class III to class I	Device	2008-11-04		2280		Pending
2008	FDA-2008-P-0630	The Prescription Project	Non-profit	Address the Growth of Online/Internet Advertising of Drugs and Devices	Device	2008-12-08		2246		Pending
2008	FDA-2008-P-0086	Honorable Russell D. Feingold United States Senate	Non-profit	Allow fluid ultrafiltered (UF) milk in domestic cheese with a standard of identity	Other	2008-02-11		2547		Pending
2008	FDA-2008-P-0136	Jeffrey Utterback	Individual	Determine limit for gluten in a food labeled gluten-free	Other	2008-08-21		2355		Pending
2008	FDA-2008-P-0242	National Toxic Encephalopathy Foundation	Non-profit	Declare Angel Men Eau du Toilette by Thierry Mugler imported and distributed into the United States by Clarins USA to be misbranded and mislabeled	Other	2008-01-04		2585		Pending
2008	FDA-2008-P-0246	Consumers Union	Non-profit	Require that all television advertisements for prescription drugs and over the counter drugs include a toll-free number and a website address for the public to report side effects to the agency.	Other	2008-01-09		2580		Pending
2008	FDA-2008-P-0309	University of Illinois at Chicago; School of Public Health, MC 922	Non-profit	Require that all cosmetic talc products bear labels with a warning such as Frequent application of talcum powder in the female genital area substantially increase the risk of ovarian cancer.	Other	2008-05-15		2453		Pending
2008	FDA-2008-P-0333	Mr. Michael Weber	Individual	Determine that wheat gluten as a pharmaceutical excipient is not generally recognized as safe or, in cases where no alternative is available, impose new labeling requirements.	Other	2008-06-02		2435		Pending
2008	FDA-2008-P-0346	Jacob S. Briskman	Individual	Develop and implement a rule for the submission of an Investigational New Drug Application that would mandate that FDA create libraries of raw research data derived from all phases of clinical trials.	Other	2008-06-04		2433		Pending
2008	FDA-2008-P-0358	James P. Reichmann	Individual	Reclassify terbutaline sulfate from pregnancy risk category B to category C,D, or X; (2) require terbutaline manufacturers to amend labeling to reflect its change in pregnancy risk category; (3) notify obstetricians of the reclassification; (4) issue another Dear Colleague letter alerting health care professionals regarding safety concerns associated with continuous subcutaneous terbutaline pump …	Device	2008-06-18		2419		Pending
2008	FDA-2008-P-0452	The Weston A. Price Foundation	Non-profit	Revoke the final rule regarding Health Claims for Soy Protein and Reduced Risk of Coronary Heart Disease.	Other	2008-08-11		2365		Pending
2008	FDA-2008-P-0509	Ms. Hallie J. Davis	Individual	Request that rye and barley be identified as major food allergens	Other	2008-06-05		2432		Pending
2008	FDA-2008-P-0632	The Prescription Proiect of Community Catalyst	Non-profit	Take enforcement action regarding online video advertisements posted on www.YouTube.com promoting Medtronic's medical device, the PRESTIGE Cervical Disc	Other	2008-12-05		2249		Pending
2008	FDA-2008-P-0634	The Prescription Project of Community Catalyst	Non-profit	Take enforcement action regarding online video advertisements posted on www.YouTube.com promoting Stryer's medical device	Other	2008-12-05		2249		Pending
2007	FDA-2007-P-0116	Dean Andrew Kantis	Individual	Ensure the safety of Americans regarding the misuses of Lasik	Device	2007-01-05		2949		Pending
2007	FDA-2007-P-0416	Sapna Lohiya	Individual	Require certain formatting parameters. such as fontsize, boldfacing. and column spacing (for drug expiration dates)	Other	2007-11-20		2630		Pending
2007	FDA-2007-P-0064	Center for Dematology and Laser Surgery	Non-profit	Request withdrawal of approval and recall of Ziana or, at a minimum, the initiation of long term safety studies evaluating the incidence and prevalence of antibiotic resistance associated with Ziana usage	Drug	2007-05-21		2813		Pending
2007	FDA-2007-P-0066	William Driscoll	Non-profit	Seek the creation of a new policy to achieve expanded accelerated development and production of pre-pandemic and pandemic vaccine	Drug	2007-12-06		2614		Pending
2007	FDA-2007-P-0107	William Driscoll (Vaccine for All)	Non-profit	Amend 21 C.F.R. 312 promotion and charging for investigational drugs re: pandemic vaccine	Drug	2006-12-28		2957		Pending
2007	FDA-2007-P-0108	Leslie Hendeles, Professor, U of Florida	Individual	Amend the Dosage of Oral Phenylephrine	Drug	2007-02-07		2916		Pending
2007	FDA-2007-P-0115	Clinical & Laboratory Standards Institute (CLSI)	Non-profit	Evaluate "clear new susceptibility test devices or modifications of existing devices using CLSI interpretive breakpoints interpretive breakpoints" in certain instances ; and (2) allow 510(k) clearance of devices for antimicrobial susceptibility testing of Streptococcus pneumoniae	Device	2007-06-29		2774		Pending
2007	FDA-2007-P-0117	Sanford J Lewis (Health Care without Harm)	Non-profit	Issue a regulation or guideline to label medical devices that leach DEHP plasticizers	Device	2007-08-14		2728		Pending
2007	FDA-2007-P-0119	Univ Illinois/Chicago SPH	Non-profit	Label milk and other dairy products produced with the use of posilac with a cancer risk warning	Drug	2007-02-20		2903		Pending
2007	FDA-2007-P-0243	Michael Dochniak	Individual	Issue a regulation for Hevea Basiliensis natural-rubber-latex, used in the manufacture of infant products	Other	2007-12-19		2601		Pending
2007	FDA-2007-P-0290	Dawn Densmore	Individual	Require all products labels to include this information : Products % Costs Packaging : 80% Content: 20%"	Other	2007-07-13		2760		Pending
2007	FDA-2007-P-0301	Jennifer McGinn	Individual	Revoke 21 C.F.R. 165.110(a)(2)(vi)	Other	2007-03-13		2882		Pending
2007	FDA-2007-P-0344	John Brahm III	Individual	Issue a new regulation wine product the composition of wine, water, sugar, with or without flavorings and an alcohol content of less than 75% can not be marketed or sold with a wine varietal designation	Other	2007-02-27		2896		Pending
2007	FDA-2007-P-0404	Ellen Ashworth	Individual	Amend its regulations for the Nutrition Facts Label as it relates to trans fats	Other	2007-01-23		2931		Pending
2007	FDA-2007-P-0412	Cary Smith	Individual	Revoke the food-processing permit granted to Bella Cucina Artful Food	Other	2007-04-03		2861		Pending
2007	FDA-2007-P-0414	Victor Yu, MD	Individual	Modify the in vitrobreakpoints for penicillin and Streptococcus pneumoniae originally set by Clinical andLaboratory Standards Institute	Other	2007-01-16		2938		Pending
2007	FDA-2007-P-0050	American Academy of Pediatricians	Non-profit	Take action related to OTC cough and cold drug products for children under 6	Drug	2007-03-01		2894		Pending
2007	FDA-2007-P-0299	Clinical & Laboratory Standards Institute (CLSI)	Non-profit	Request that CDER update the official drug labels for penicillin G potassium and penicillin G sodium for injection	Drug	2007-07-03		2770		Pending
2006	FDA-2006-P-0141	John Stephens, MD	Individual	Ban the Acu-Gender Blood Test	Device	2006-09-11		3065		Pending
2006	FDA-2006-P-0334	Center for Science in the Public Interest	Non-profit	Announce an Advance Notice of Proposed Rulemaking regarding the use of symbols on the principal display panel that would communicate to consumers the healthfulness of foods	Other	2006-12-11		2974		Pending
2006	FDA-2006-P-0017	Dr. Wallwork	Individual	Ban potassium bromate from breadmaking	Other	1995-09-27		7067		Pending
2006	FDA-2006-P-0099	Center for Science in the Public Interest	Non-profit	Issue standards and regulations to help ensure the safe production of fruits and vegetables	Other	2006-11-20		2995		Pending
2006	FDA-2006-P-0138	Washington Legal Foundation	Non-profit	Undertake a comprehensive review of Agency practices and policies relating to prescription drug advertising and promotional labeling	Drug	2006-08-11		3096		Pending
2006	FDA-2006-P-0143	Public Citizen	Non-profit	Revoke FDA's priorapproval of vagus nerve stimulation (VNS) for management of treatment-resistant depression (TRD),	Drug	2006-09-06		3070		Pending
2006	FDA-2006-P-0208	Harold Newmark (Rutgers)	Non-profit	Amend regulations to require Vitamin D be added to cereal-grain products	Other	2006-05-12		3187		Pending
2006	FDA-2006-P-0282	Governers of States of Vermont, Kansas, Minnesota, Wisconsin	Non-profit	Issue guidance documents outlining the specific approval requirements for forms of insulin and human growth hormone	Drug	2006-08-03		3104		Pending
2006	FDA-2006-P-0323	National Coaltion for Cancer Survivorship	Non-profit	Expanded access programs for unapproved drugs	Drug	2006-03-27		3233		Pending
2006	FDA-2006-P-0394	Food and Drug Law Class	Non-profit	Issue a regulation that would efficaciously inform the general public about the qualitative caffeine content of the foods they consume	Other	2006-01-19		3300		Pending
2006	FDA-2006-P-0449	Charles Weber	Individual	Make naltrexone available over-the-counter	Drug	2006-12-05		2980		Pending
2006	FDA-2006-P-0452	National Women's Health Network	Non-profit	Stop Solvay Pharmaceuticals and Breckenridge Pharmaceuticals from marketing esterified estrogens and methyltestosterone combination products for vasomotor symptoms associated with menopause	Drug	2006-08-22		3085		Pending
2006	FDA-2006-P-0455	Center for Science in the Public Interest	Non-profit	Issue an advance notice of proposed rulemaking regarding the use of symbols on the principal display panel that would communicate the healthfulness of foods	Other	2006-12-05		2980		Pending
2006	FDA-2006-P-0518	George Washington University Medical Center	Non-profit	Cancel the GRAS designation for diacetyl until testing is completed and the results are independently evaluated	Drug	2006-09-12		3064		Pending
2006	FDA-2006-P-0267	Center for Dermatology and Laser Surgery	Non-profit	Withdraw aprpoval and recall of Ziana (or initiation of a long-term safety study evaluating the incidence and prevalence of antibiotic resistance associated with Ziana usage)	Drug	2006-12-20		2965		Pending
2006	FDA-2006-P-0392	Charles Nolan, MD	Individual	Withdraw the New Drug Application (NDA 21-179) for Renagel Tablets (sevelamer hydrochloride); 400 and 800 milligrams, marketed by Genzyme Corporation, because of the association of this drug with intestinal obstructions and perforations in dialysis patients	Drug	2006-05-04		3195		Pending
2005	FDA-2005-P-0434	Elizabeth Trevino	Individual	Approve Baby Chamomile Juice, 100% natural juice, containing chamomile flowers and filtered baby water	Other	2005-06-13		3520		Pending
2005	FDA-2005-P-0055	Rosei Rocha-Judd	Individual	Recommend scheduling of tramadol under the Controlled Substances Act	Drug	2005-11-15		3365		Pending
2005	FDA-2005-P-0058	Gregory Skipper, MD	Individual	Recommend scheduling of tramadol under the Controlled Substances Act	Drug	2005-10-25		3386		Pending
2005	FDA-2005-P-0060	Center for Science in the Public Interest	Non-profit	Require labeling of carbonated drinks with more than 1.1 grams of high fructose corn syrup or more than 10 milligrams of caffeine per 12 ounce serving	Other	2005-07-13		3490		Pending
2005	FDA-2005-P-0126	David Getoff	Individual	Preclude the declaration of beta carotenes in foods as vitamin A.	Other	2005-05-15		3549		Pending
2005	FDA-2005-P-0129	Dan Kelch	Individual	Require that a mailing address, rather than the current provision that requires a street address, be placed on all packaged food product labels	Other	2005-10-06		3405		Pending
2005	FDA-2005-P-0191	Pine Grove Recovery Center (Dr. Ovson)	Non-profit	Recommend scheduling of tramadol under the Controlled Substances Act	Drug	2005-11-02		3378		Pending
2005	FDA-2005-P-0194	Warren Rucker	Individual	Conduct an evaluation of psychotic adverse event reports associated with Keppra (levetiracetam) and determine whether the patient information is adequate	Drug	2005-12-30		3320		Pending
2005	FDA-2005-P-0195	Dept of the Planet Earth	Non-profit	Rescind the Generally Recognized as Safe (GRAS) status of aluminum-based substances	Other	2005-09-14		3427		Pending
2005	FDA-2005-P-0196	Center for Science in the Public Interest	Non-profit	Revoke GRAS status for salt, amend prior sanctions for the use of salt	Other	2005-11-08		3372		Pending
2005	FDA-2005-P-0428	Gordon L. Flynn	Individual	Not approve liquid reservoir transdermal delivery systems	Drug	2005-10-28		3383		Pending
2005	FDA-2005-P-0317	Beyond Pesticides	Non-profit	Ban all non-medical uses of triclosan, also known as Irgasan	Drug	2005-10-25		3386		Pending
2004	FDA-2004-P-0115	Barbara E. Kennedy-Neslusan	Individual	Labeling for drug products declare the presence of inactive ingredients that may be food allergens	Other	2004-02-27		3992		Pending
2004	FDA-2004-P-0155	Cancer Action NY	Non-profit	Persistent organic pollutants including polychlorinated dibenzo-p-dioxins (PCDDs), polychlorinated dibenzofurans (PCDFs) and dioxin-like polychlorinated biphenyls (PCBs).	Other	2004-01-07		4043		Pending
2004	FDA-2004-P-0157	Robert Cohen	Individual	Revoke the regulation that approved POSILAC, Monsanto’s bovine growth hormone.	Drug	2004-02-06		4013		Pending
2004	FDA-2004-P-0210	CENTER FOR SCIENCE IN THE PUBLIC INTEREST	Non-profit	Improve the nutrition labeling of single-serve packages of three categories of food and beverage products.	Other	2004-10-29		3747		Pending
2004	FDA-2004-P-0279	Center for Science in the Public Interest	Non-profit	Reconsideration of FDA-2004-P-0278	Other	2009-11-29		1890		Pending
2004	FDA-2004-P-0334	Environmental Working Croup	Non-profit	Correction of information regarding FDA’s “Advice For Women Who Are Pregnant, Or Who Might Become Pregnant, And Nursing Mothers, about Avoiding Harm to Your Baby Or Young Child From Mercury in Fish And ShellFish	Other	2003-12-22		4059		Pending
2004	FDA-2004-P-0406	State of Illinois, Attorney General's Office	Non-profit	Authorize a pilot Program for importation of prescription drugs in the State of Illinois.	Drug	2004-04-13		3946		Pending
2004	FDA-2004-P-0496	Mr. Amit Wohl	Individual	Amend its regulations regarding drug sample distribution by mail or common carrier to allow the drug sample recipient to execute an electronic receipt in lieu of a written receipt.	Drug	2004-12-01		3714		Pending
2004	FDA-2004-P-0203 /0386	Northwest Community Hospital	Non-profit	FDA to take action toward medical device manufacturers regarding the interchangeability of medical devices with one another	Device	2004-08-18		3819		Pending
2003	FDA-2003-P-0403 /FDA-2003-P-0297	Peter M. Rothenberg, MD, MA	Individual	Exemption for an accessory to an electrode cable	Device	2003-06-30		4234		Pending
2003	FDA-2003-P-0175	John W. Bode (Olsson, Frank and Weeda, P.C.)	Individual	conduct a notice-and-comment rulemaking to implement Public Health Security and Bioterrorism Preparedness and Response Act of 2002	Other			42036		Pending
2003	FDA-2003-P-0226	Erick Swanson	Individual	Revoke the requirement for salmonid fish that have been fed feeds containing the carotenoid astaxanthin to have the label “ color added” or artificial”	Other	2003-06-02		4262		Pending
2003	FDA-2003-P-0291	Center for Science in the Public Interest	Non-profit	immediately use the best available industry practices for setting interim acceptable limits for acrylamide for different classes of food	Other	2003-06-04		4260		Pending
2003	FDA-2003-P-0349	Dominic J Morgan	Individual	Medical Devices used for Elective Refractive Eye Survey with Premarket Approvals	Device	2003-09-23		4149		Pending
2003	FDA-2003-P-0009	Abigail Alliance for Better Access t Developmental Drugs	Non-profit	Approval for "promising drugs, biologics and devices"	Drug	2003-06-11		4253		Pending
2003	FDA-2003-P-0177	Stockbridge Family Medicine	Non-profit	Have all food products which contain gluten, a natural but known toxic polypeptide, be marked with a simple but clear warning	Other	2003-12-23		4058		Pending
2003	FDA-2003-P-0238	Various States (Bordering Canada)	Non-profit	Waive or revoke the current FDA interpretation of statutes and regulations that prohibits thhe purchase of prescription medications from sources in Canada	Drug	2003-12-12		4069		Pending
2002	FDA-2002-P-0226	Center for Science in the Public Interest	Non-profit	Undertake several rulemaking actions with regard to “functional foods” and to establish an advisory committee to reevaluate current labeling approaches for foods with novel ingredients	Other	2002-03-21		4700		Pending
2001	FDA-2001-P-0086	Washington Legal Foundation	Non-profit	Dissemination of non-misleading information concerning unapproved new uses of FDA-approved products	Drug	2001-05-25		5000		Pending

## Sheet: 2013
Docket No.	Petitioner	Product Name/Issue	Category	Receipt Date	Decision Date
FDA-2013-P-0735	Mario Morais	Request that Ombudseman for Center for Devices and Radiological Devices to forward comments and answer comment with respect to Chronic Cerebrospinal Venous Insufficiency	Device	2013-06-11	2014-06-19
FDA-2013-P-0711	Allergy & Asthma Network Mothers of Asthmatics	Rx/OTC Asthma and Anaphylaxis Medications	Drug	2013-06-13
FDA-2013-P-0703	Center for Lawful Access and Abuse Deterrence	Abuse-Deterrent Opioids	Drug	2013-06-11	2013-10-25
FDA-2013-P-0695	Steven A. Zecola	Metastatic Cancer	Drug	2013-06-06	2014-07-28
FDA-2013-P-0693	Center for Medicine in the Public Interest	TREANDA (bendamustine) for Injection	Drug	2013-06-07	2013-09-13
FDA-2013-P-0522	Escher Fund for Autism	DICLEGIS (doxylamine succinate and pyridoxine hydrochloride) Delayed-release Tablets	Drug	2013-04-30	2014-08-04
FDA-2013-P-0380	Univ of Florida College of Medicine/UNC School of Medicine	Medroxyprogesterone Acetate	Drug	2013-04-02	2015-07-07
FDA-2013-P-0351	Center for Food Safety & Institute for Agriculture and Trade Policy	Antibiotics in Food-Producing Animals	Drug	2013-03-15
FDA-2013-P-0298	Yale University	Metformin	Drug	2013-03-12
FDA-2013-P-0048	James P Reichmann	ZOFRAN (ondansetron)	Drug	2013-01-07	2015-10-27
FDA-2013-P-0228	Douglas Barasatian	Bleached White Flour GRAS Status	HC	2013-02-21
FDA-2013-P-0217	Center for Science in the Public Interest	Added Sugars/High-Fructose Corn Syrup	HC	2013-02-20
FDA-2013-P-0047	American Heart Association	Raw fruits & vegetables; Single-ingredient or mixtures of frozen or canned fruits and vegetables	HC	2013-01-09
FDA-2013-P-0472	Richard C. Theuer, Ph.D.	GRAS Status of Carrageenan	HC	2013-04-19	2014-07-30
FDA-2013-P-0291	Fukushima Fallout Awareness Network (Citizens for Health)	Cesium 134 and Cesium 137 contamination	HC	2013-03-12
FDA-2013-P-0615	State of California Department of Consumer Affairs	Hearing Aid Dispensers	Device	2012-06-04
FDA-2013-P-0199	Richard M. Karcich	Software Validation	Device	2013-02-15
FDA-2013-P-0435	Tobacco Control Legal Consortium, et al	Prohibit Menthol as a Characterizing Flavor in Cigarettes	HC	2013-04-12
FDA-2013-P-0285	New York City Department of Health & Mental Hygiene, et. al.	Tobacco Products - Track and Trace System	HC	2013-03-11
FDA-2013-P-0776	Biotechnology Information Institute	Request to assign both unique andbiosimilar/(bio)generic-type (or class) names/identifiers for approved biologic products andtheir active agents, along with disclosures of sufficient public information to enable anadequate understanding of product identity, what the products/agents are.	Drug	2013-06-21

## Sheet: 2012
Docket No.	Petitioner	Product Name/Issue	Category	Receipt Date	Decision Date
FDA-2012-P-0119	Mario Morais	The current FDA rules and regulations protect clinical trials, not human life or human rights	HC	2012-02-03	2014-06-19
FDA-2012-P-0404	Public Citizen Health Research Group	Immediately remove from the market the diabetes drug Victoza (liraglutide)	Drug	2012-04-20	2014-03-25
FDA-2012-P-0747	Leroy Leslie Hamilton, Ph.D.	Conduct an impartial investigation to determine whether Form FDA 3429 General Device Classification questionnaire is in compliance with the definition of class III.	Device	2012-07-10	2013-03-04
FDA-2012-P-1160	Steven A. Zecola	Recognize breast cancer in individuals who are positive for the BRCA-1 gene mutation as a distinct group and withdraw approval of anthracycline, cyclophosphamide and taxane drugs (ACT) as an adjuvant therapy for BRCA1-related breast cancer because these drugs expose patients to safety risks and have not been shown to be effective in this group.	Drug	2012-11-20	2014-07-09
FDA-2012-P-0607	AIDS Healthcare Foundation	Invalidate the findings and recommendations of the Antiviral Drugs Advisory Committee (A VDAC), with respect to an efficacy supplement for a new drug application (sNDA) of Gilead Sciences, Inc. (Gilead) for once-daily Truvada (emtricitabine/tenofovir disoproxil fumarate) for pre-exposure prophylaxis (PrEP) to reduce the risk of sexually acquired human immunodeficiency virus-1 (HIV -1) transmissio…	Drug	2012-06-08	2012-07-16
FDA-2012-P-0226	AIDS Healthcare Foundations	Not approve a pending supplemental new drug application (supplement or sNDA) submitted by Gilead Sciences, Inc. (Gilead) on December 15, 2011, which seeks permission to market once daily Truvada (emtricitabine/tenofovir disoproxil fumarate) for preexposure prophylaxis (PrEP) to reduce the risk of sexual acquisition of human immunodeficiency virus-l (HIV- 1) in uninfected adults at high risk. AHF …	Drug	2012-03-07	2012-07-16
FDA-2012-P-0818	Physicians for Responsible Opioid Prescribing	Change opioid analgesic labels as follows: (1) "[s]trike the term 'moderate' from the indication for non-cancer pain," (2) "[a]dd a maximum daily dose, equivalent to 100 milligrams of morphine for noncancer pain," and (3) "[a]dd a maximum duration of 90-days for continuous (daily) use for noncancer pain."	Drug	2012-07-25	2013-09-10
FDA-2012-P-0857	Sheller, P.C.	Take certain actions related to your pending citizen petition regarding Risperdal (risperidone) and Invega (paliperidone).	Drug	2013-07-02	2014-11-25
FDA-2012-P-0146	Center for Science in the Public Interest	Request to take regulatory action to establish a performance standard of non-detectable levels for vivrio vulnificus in moluscan shellfish.	HC	2012-02-09
FDA-2012-P-0275	William H. Lamont	Discontinue the present use of bases for environmental considerations that are improper extensions specifically of (1) the current regulations at 21 CFR 25.32(i), and (2) the current general regulations at 21 CFR part 25, subpart B	HC	2012-03-16
FDA-2012-P-0379	Dr. David Behar	Require certain labeling and other changes to the labeling of clozapine to provide a means for patients suffering from treatment-resistant schizophrenia who also have benign ethnic neutropenia to be treated with clozapine.	HC	2012-04-16
FDA-2012-P-0493	Leroy Leslie Hamilton, Ph. D.	Reclassify Cranial Electrotherapy Stimulator from Class Ill to Class II	Device	2012-05-16
FDA-2012-P-0904	Citizens for Health	Take action to protect the public from the illegal, mislabeled use of high fructose corn syrup containing fructose amounts above 55 percent and (2) require the labeling of high fructose corn syrup to include the fructose percentage.	HC	2012-08-15
FDA-2012-P-0909	Michael D. Lorton, M.D.	Assert the right of the United States to use, or to authorize the use of, the production processes used to make all reference monoclonal antibody products approved under the Public Health Service Act.	HC	2012-08-16
FDA-2012-P-0963	Charles J. Zimmer	Take regulatory and administrative action regarding the manufacture and use of Blood Nutrition Software, specifically such software recommending complementary and alternative medicine therapy (CAM) based on interpreted blood test results.	Device	2012-08-31
FDA-2012-P-1007	Public Citizen Litigation Group	Revoke its "minor deletions" policy in responding to Freedom of Information Act requests.	HC	2012-09-19
FDA-2012-P-1053	Public Citizen	Add a black box warning on the labels of all angiotensin-converting enzyme inhibitors (ACEls), angiotensin II receptor blockers (ARBs), and aliskiren, indicating that taking these drugs together, in any combination, increases the risks of potentially life-threatening side effects without any added health benefit over individual use of the drugs.	Drug	2012-10-10	2015-04-03
FDA-2012-P-1158	Ms. Milagros Demier	Request denial of Genetically Modified Mosquitoes experiment in Key West, Florida.	HC	2012-11-21
FDA-2012-P-1179	Jack M. Saroyan, DDS	Request that a regulation be issued to permit the addition of potassium fluoride to iodized salt for the prevention of Iodine Deficiency Disease and dental caries.	HC	2012-11-29	2016-02-02
FDA-2012-P-1252	Animal Legal Defense Fund; Center for Food Safety	Numerous requests concerning Codex standards for ractopamine	HC	2012-12-20
FDA-2012-P-1052	New York Presbyterian Hospital, Weill-Cornell	Eliminate the Boxed Warning regarding Lactic Acidosis associated with metformin; relax the Contraindication against metformin use in renal impairment so that the contraindication does not apply to patients with a creatinine clearance greater than 30 milliliters/minute (mL/min); revise the Precautions section to emphasize close monitoring of renal function rather than strict avoidance of metfonnin…	HC	2012-10-09

## Sheet: 2011
Docket No.	Petitioner	Product Name/Issue	Category	Receipt Date	Decision Date
FDA-2011-P-0297	Public Citizen's Health Research Group	Immediate withdraw from marketing Xenical (orlistat) and Alli (orlistat)	Drug	2011-04-25	2013-12-16
FDA-2011-P-0438	Public Citizen Health Research Group	Ban and recall all Bedside Assistant bed handles	Device	2011-05-04	2013-12-19
FDA-2011-P-0455	Public Citizen	Withdraw from marketing Aricept (donepezil hydrochloride) 23 mg tablets and add a warning label for Aricept 5 mg and 10 mg tablets	Drug	2011-05-18	2012-11-06
FDA-2011-P-0484	Center for Biological Diversity/Stanford Envrionmental Law Clinic/Turtle Island Restoration Network	Reduce human exposure to mercury and limit allowable levels of mercury in commercially sold seafood in the United States	HC	2011-06-20	2013-03-01
FDA-2011-P-0355	Joseph V. Gulfo, M.D., MELA Sciences	Request to Enforce 10/20/2004 Sec. 520(g)(7) Protocol Agreement	Device	2011-05-09	2011-11-02
FDA-2011-P-0475	Dr. S. Albert Edwards	Investigate Edwards Lifesciences, Northwestern University IRB and Dr. Patrick McCarthy and Annuloplasty Rings	Device	2011-06-14	2012-02-27
FDA-2011-P-0497	Daniel J. Popeo, Washington Legal Foundation	Request FDA Not to Use Advice from IOM Committee That Fails to Comply with FACA's Fair Balance Requirement	Device	2011-06-13	2012-02-12
FDA-2011-P-0552	Robert Wagner	Request to Issue Regulations Related to Outdoor Luminaires	Device	2011-07-19	2011-12-16
FDA-2011-P-0777	Thomas W. Nerney, Institute for Health Quality and Ethics	Request to Fully Implement and Enforce Mammogram Quality Standards Amendment Act of 1992	Device	2011-10-21	2013-10-28
FDA-2011-P-0923	Michael A. Carome, M.D., Public Citizen's Health Research Group	Request to Immediately Withdraw Approval of Humanitarian Device Exemption (HDE) Application for Wingspan Stent System	Device	2011-12-22	2012-08-08
FDA-2011-P-0641	Michael Carome, Public Citizen's Health Research Group	Recall and ban the marketing of all non-absorbable surgical mesh products for transvaginal repair of pelvic organ prolapse (POP); classify all new non-absorbable surgical mesh product for transvaginal repair ofP OP as class III devices	Device	2011-08-26	2014-05-01
FDA-2011-P-0055	C. Allen Black, Ph.D., J.D.	Require Genzyme Corporation (Genzyme) to allocate full doses of Fabrazyme (agalsidase beta) to U.S. citizens under FDA's consent decree with Genzyme.	Drug	2011-01-19	2014-08-11
FDA-2011-P-0407	Center for Science in the Public Interest	Revoke use of caramel produced by the ammonia or ammonia-sulfite process because of the impurities 2-methylimidazole (2-MEI) and 4-MEI.	HC	2012-03-05
FDA-2011-P-0018	Dwayne A. Ratleff	Request new rules to regulate the use of electronic versions of ingredient list and nutrition facts labels	HC	2011-01-03
FDA-2011-P-0151	Brian C. Mandingo	Take enforcement action against the Church of Scientology and its affiliated entities for their unsanctioned use ofthe "E-Meter"	HC	2011-03-08
FDA-2011-P-0276	Environmental Working Group	Investigate business practices, and require labels for hair-straighteners that contain formaldehyde	HC	2011-04-12
FDA-2011-P-0331	Public Citizen Health Research Group	Ban the use of cornstarch powder on all surgical and examination gloves	HC	2011-05-02
FDA-2011-P-0356	Center for Tobacco Regulation, University of Maryland School of Law	Assert jurisdiction over cigars and subject cigars to certain sales and distribution regulations that apply to cigarettes and smokeless taboccao under the Family Smoking Prevention and Tobacco Control Act.	HC	2011-05-10
FDA-2011-P-0437	Cancer Action NY	Immdiately publish and disseminate a persistent organic pollutants health hazard advisory	HC	2011-05-19
FDA-2011-P-0448	Earthjustice	AquAdvantage Salmon	HC	2011-06-01	2015-11-19
FDA-2011-P-0458	Personal Care Products Council	Lead levels in cosmetics	HC	2011-06-08
FDA-2011-P-0537	Earthjustice	seafood containing elevated levels of methylmercury	HC	40729
FDA-2011-P-0331	Michael A. Carome, M.D., Public Citizen Health Research Group	Ban Cornstarch Powder on Medical Gloves & Ban Use of All Natural Latex Rubber Medical Gloves	Device	2011-05-02
FDA-2011-P-0479	Dr. S. Albert Edwards	Request to Investigate Placement of Annuloplasty Rings & Number of Deaths from Annuloplasty Rings for Past 5 Years	Device	2011-06-14
FDA-2011-P-0590	Kim Witczak and William K. Vaughan	Request Administrative Action to Improve Involvement of Patients & Consumers in Reporting of Adverse Drug and Device Events	Device	2011-08-10
FDA-2011-P-0820	G. Scott Crowther, PE	Reconsider Dose of Mercury Released From Dental Amalgam and Ban Dental Amalgam and Its Components	Device	2011-11-09

## Sheet: 2010
Docket No.	Petitioner	Product Name/Issue	Category	Receipt Date	Decision Date
FDA-2010-P-0089	Center for Tobacco Regulation, Litigation and Advocacy, University of Maryland School of Law	Agency alter the manner in which it reviews, regulates, and labels nicotine replacement therapy medications	Drug	2010-02-12	2013-04-01
FDA-2010-P-0339	Richard F. Edlich, M.D., Ph.D., University of Virginia Health System Trauma Specialists, LLP, Legacy Emanuel Hospital	Require all operating room personnel to wear a powder-free double glove hole indicator system when performing surgical procedures on patients diagnosed with Human Immunodeficiency Virus (HIV), Hepatitis B, or Hepatitis C.	HC	2010-06-23	2012-01-31
FDA-2010-P-0393	Mr. Pack, Mr. Merrill, Ms. Haight and Ms. Rovero	Issue a public statement clarifying that there is insufficient in vivo clinical data to support news reports that the newly FDA-approved, reformulated OxyContin is less addictive or less abusable than the traditional OxyContin formulation or other extended-release oxycodone medications.	Drug	2010-07-20	2011-11-07
FDA-2010-P-0377	Great Lakes Environmental Law Center; Natural Resources Defense Council	Revoke 21 CFR § 25.31 (b) which establishes a categorical exclusion from the requirement to prepare an environmental assessment or environmental impact statement for certain Agency actions	HC	2010-07-12	2013-02-22
FDA-2010-P-0454	Campaign for Tobacco-Free Kids See FDA-2010-P-0089	Agency alter the manner in which it reviews, regulates, and labels nicotine replacement therapy medications	Drug	2010-02-12	2013-04-01
FDA-2010-P-0592	Richard F. Edlich, MD, PhD	FDA ban the sale of liquid (elemental) mercury to consumers.	HC	2010-11-17	2011-08-12
FDA-2010-P-0446	Richard F. Edlich, M.D., Ph.D. University of Virginia Health System	Require surgical glove manufacturers to place on each surgical glove and package containing surgical gloves a warning label indicating that the glove hole leakage rate is 1.5%.	Device	2010-08-20	2012-01-31
FDA-2010-P-0179	Stradley Ronon Stevens & Young, LLP; Richard Semelka, M.D. & Diego R. Martin, M,D., Ph.D., F.R.C.P.	Continue class labeling in the pharmacologic class of gadolinium-based contrast agents relating to the risk of nephrogenic systemic fibrosis (NSF) and refrain from implementing differential NSF risk-based labeling; and other related requests.	Drug	2010-04-01	2010-12-20
FDA-2010-P-0312	Natural Resources Defense Council	Immediately recall and withdraw approval of lindane as a treatment option for head lice and scabies	Drug	2010-06-15	2012-11-20
FDA-2010-P-0081	Truth in Labeling Coalition	Review a section of the Statement for Policy: Foods Derived from New Plant Varieties that states "VI Labeling ... The agency is not aware of any information showing that foods derived by these new methods differ from other foods in any meaningful or uniform way, or that, as a class, foods developed by the new techniques present any different or greater safety concerns than foods developed by trad…	HC	2010-01-12	2015-11-19
FDA-2010-P-0045	Richard F . Edlich, MD, PhD, Biomedical Engineering and Emergency Medicine, University of Virinia Health System	Remove the consumer report "Medical Glove Powder Report" from the FDA website	Device	2010-01-19
FDA-2010-P-0050	Public Citizen	Remove from the market the drug Savella (milnacipran) on the grounds that it has questionable clinical efficacy and carries potentially serious risks.	Drug	2010-01-20
FDA-2010-P-0052	Richard F . Edlich, MD, PhD, Biomedical Engineering and Emergency Medicine, University of Virinia Health System	Remove cornstarch powder from medical gloves because it promotes the growth of cancer,.	Device	2010-01-14
FDA-2010-P-0056	Richard F . Edlich, MD, PhD, Biomedical Engineering and Emergency Medicine, University of Virinia Health System	Prepare informed consent dental restorations	Device	2010-01-14
FDA-2010-P-0091	Emily Robin, et al.	Requesting Changes in Benzodiazepine Labeling	Drug	2010-02-16	2015-06-12
FDA-2010-P-0093	Joel L. Nitzkin, MD, MPH, DPA, Tobacco Control Task Force, American Association of Public Health Physicians (AAPHP)	Reclassification of E-cigarettes or electronic cigarettes	Device	2010-02-17
FDA-2010-P-0095	Joel L. Nitzkin, MD, MPH, DPA, Tobacco Control Task Force, American Association of Public Health Physicians (AAPHP)	Reclassification of E-cigarettes or electronic cigarettes from "drug-device combination" to "tobacco product"	Device	2010-02-17
FDA-2010-P-0651	Natural Solutions Foundation	A number of issues related to influenza vaccines ahd request that FDA take a variety of actions to address these issues.	Drug	2010-12-22
FDA-2010-P-0150	United States Pharmacopeial Convention	Amend the regulations in 21 CFR Parts 170 and 184 to incorporate by reference the Food Chemicals Codex 7th Edition	HC	2010-03-15
FDA-2010-P-0352	Dr. Richard Edlich Distinguished Professor Emeritus of Plastic Surgery Engineering and Emergency Medicine University of Virginia Health System	Revise the device classification of cornstarch powdered examination and surgical gloves	Device	2010-06-30
FDA-2010-P-0392	Dr. Richard Edlich Distinguished Professor Emeritus of Plastic Surgery Engineering and Emergency Medicine University of Virginia Health System	Ban cornstarch powder on all surgical and examination gloves	Device	2010-07-15
FDA-2010-P-0397	Dr. Richard Edlich Distinguished Professor Emeritus of Plastic Surgery Engineering and Emergency Medicine University of Virginia Health System	Ban the use of cornstarch powder in surgical gloves in In Vitro	Device	2010-07-22
FDA-2010-P-0489	Richard F. Edlich, M.D., Ph.D. University of Virginia Health System	Establish Citizen Petition guidelines for the FDA so that the decision is announced to the author of the Petition and the public as well as implemented in a timely manner.	HC	2010-09-14
FDA-2010-P-0504	The GMA Nut Safety Task Force	Develop guidance for industry on controlling Salmonella and other food safety hazards in peanuts and tree nuts.	HC	2010-09-21
FDA-2010-P-0610	Dr. Richard Edlich, MD, PhD Distinguished Professor University of Virginia Health Systems	revise the device classification of dental restorative materials and liquid mercury	Device	2010-11-23
FDA-2010-P-0617	Dr. Richard Edlich, MD, PhD Distinguished Professor University of Virginia Health Systems	Ban mercury amalgam because it can precipitate the development of severe diseases	Device	2010-11-24
FDA-2010-P-0619	Dr. Richard Edlich, MD, PhD Distinguished Professor University of Virginia Health Systems	Ban mercury (Hg) amalgam because it has documented adverse effects on the pregnant woman and fetus	Device	2010-11-29
FDA-2010-P-0641	Washington Action for Safe Water	Take action against manufacturers of unapproved and misbranded fluoridated water	HC	2010-11-20
FDA-2010-P-0652	Timothy Demitri Brown	Repeal and/or revoke a regulation of 21 U.S.C. § 379a and any corresponding CFR statute.	HC	2010-12-27

## Sheet: 2009
Docket No.	Petitioner	Product Name/Issue	Category	Receipt Date	Decision Date
FDA-2009-P-0074	E Douglas Kramer, MD	Review abbreviated NDA for Subutex/Suboxone	Drug	2009-02-13	2009-02-23
FDA-2009-P-0111	Thomas J. Quin	Request to "fine Carestream Health and order full compliance with 21 CFR 1020.30-32 and 820.170"	Other	2009-02-24	2009-10-13
FDA-2009-P-0124	Todd Crum	Test women for blood disorder factor V Leiden (and other blood clots) before prescribing 3-gen oral contraceptives	Drug	2009-02-23	2013-05-10
FDA-2009-P-0186	Caryn Kanzer	Immediately remove Patent 5,045,552, "Pyridine derivatives having anti-ulcerative activity," from listing in FDA's Approved Drug Products with Therapeutic Equivalence Evaluations (Orange Book), to permit generic equivalents to enter the market in the United States.drug,2Aciphex (rabeprazole sodium), to enter the market in the United States.	Drug	2009-04-09	2009-10-01
FDA-2009-P-0208	Public Citizen	Request sufficient safety warning for Amitiza (lubiprostone) for safe use in women of child-bearing potential	Drug	2009-05-06	2012-11-26
FDA-2009-P-0227	The National Center on Addiction And Substance Abuse at Columbia University	Promulgate regulations intended to strengthen FDA regulation of opioids and other controlled prescription drugs and to help minimize the risks of diversion and abuse of such drugs	Drug	2009-05-15	2013-06-17
FDA-2009-P-0425	Gail Elbek	Take regulatory action concerning extensive documented evidence proving multiple health-damaging effects are caused by soyphytotoxic endocrine disruptors and antinutrients	Other	2009-08-31	2012-03-28
FDA-2009-P-0446	Virginia Commonwealth University Institute for Drug and Alcohol Studies	Modify the product labeling and limit the distribution of buprenorphine	Drug	2009-09-16	2010-03-15
FDA-2009-P-0471	Mr. Antell and Mr. Brayshaw	Recognize the crisis of hepatitis C (HCV) among people with bleeding disorders and take definite steps to allow people with bleeding disorders and HCV to have access to promising HCV investigational drugs beyond current clinical trials	Drug	2009-09-29	2010-04-23
FDA-2009-P-0553	Darrin Malakowsky	Amend the listing of color additives exempt from certification to include Mica-based pearlescent pigments	Other	2009-11-10	2010-04-27
FDA-2009-P-0594	Center for Food Safety; Institute for Agriculture and Trade Policy	Immediately suspend the approval of all new animal drug applications (NADAs) for arsenic-containing compounds used as feed additives for food animals	Other	2009-12-11	2011-08-09
FDA-2009-P-0595	Public Citizen's Health Research Group	Immediately ban the weight loss drug Meridia (sibutramine) because of the early results from the Sibutramine Cardiovascular Outcomes Trial (SCOUT trial) and reports to FDA's Adverse Event Reporting System (AERS)	Drug	2009-12-03	2011-01-03
FDA-2009-P-0598	James Matthew Weber	Amend the labeling requirements for iodine-containing intravenous contrast agents to include specific warnings and identify known risk factors for kidney damage	Drug	2009-12-17
FDA-2009-P-0154	UNC Gillings School of Global Public Health	Apply certain standards to generic versions of Subutex (buprenorphine hydrochloride (HCl) sublingual tablets) and Suboxone (buprenorphine HCl and naloxone HCl dihydrate sublingual tablets)	Drug	2009-03-17	2009-09-03
FDA-2009-P-0150	Arthur K. Yellin	Create a Separate Classification for Gloves used in Preparing and Administering Chemotherapeutic Drugs	Device	2009-03-18	2010-08-24
FDA-2009-P-0207	Thomas Quinn	Request for Immediate Class One Recall of Philips Medical Devices	Device	2009-05-05	2013-09-27
FDA-2009-P-0253	Scott A. Tolchin	Petition for FDA to Inspect LASIK Cinics to Ensure Compliance with 21 CFR 803, Subpart C User Facility Reporting Requirements	Device	2009-05-25	2010-05-18
FDA-2009-P-0362	Ryszard Rokicki	Request that FDA Issue an Order Mandating Inspection of every peripheral stent, cardiovascular stent, heart valve and IVC filter composed of Nitinol for Intermetallic Inclusions before Sterilization	Device	2009-07-29	2011-02-25
FDA-2009-P-0437	Edward Manougian	Establish testing methods for products to be used by the lay public in emergency situations	Device	2010-03-07	2010-08-24
FDA-2009-P-0566	American Dental Association	Review and establish an appropriate regulatory classification for all tooth whitening preparations that act by chemical means to lighten tooth color	Drug	2009-11-24	2014-04-22
FDA-2009-P-0156	K Paul Stoller, MD FACM	Withdraw approval for the chemical commonly known as aspartame	Other	2009-03-18	2014-10-01
FDA-2009-P-0357	International Academy of Oral Medicine and Toxicology	Petition to Ban Dental Amalgam or Classify the Device as Class III	Device	2009-07-28	2015-01-27
FDA-2009-P-0039	Parents United for Pharmaceutical Safety and Accountability	Take numerous safety actions with respect to Singulair	Drug	2009-01-30	2011-06-07
FDA-2009-P-0426	Medical Technology and Practice Patterns Institute	Require changes to labeling of and addiitonal safety warnings for Epogen/Procrit (epoetin alfa) and Aranesp (darbepoetin alfa) with respect to a safe target hematocrit/hemoglobin range and a safe dose	Drug	2009-09-01	2011-06-24
FDA-2009-P-0094	American Association for Health Freedom	Consider the potential risks of exposure to Bisphenol-A for dental application	Drug	2009-02-18
FDA-2009-P-0122	K Paul Stoller, MD FACM	To recall all vaccines that contain ingredients that have not been shown to be safe	Other	2009-02-27
FDA-2009-P-0252	Tufts Health Care Institute Program on Opioid Risk Management	Publish a Guidance for Industry and take certain other steps to promote the development of abuse-deterrent formulations of opioid analgesics	Drug	2009-05-27	2015-04-01
FDA-2009-P-0418	Natural Solutions Foundation	Take a variety of actions to address issues related to the influenza vaccine	Drug	2010-12-22
FDA-2009-P-0518	William A. Green; Mounir Birrou	Amend the Skin Protectant Drug Products for Over the-Counter Human Use; Astringent Drug Products; Final Monograph (21 CFR 347.12(b)) to include additional dosage delivery devices such as single use, sanitary, disposable applicators to prevent cross-contamination of the OTC product and subsequent transfer of blood-borne pathogens from person to person	Other	2009-10-15
FDA-2009-P-0147	International Dairy Foods Association ("IDEA") and National Milk Producers Federation ("NMPF")	Amend the milk and milk product standards to permit any safe and suitable sweeteners.	Other	2009-03-16
FDA-2009-P-0405	Food Animal Concerns Trust	Declare poultry litter to be a food additive and to ban its use as a feed for cattle	Other	2009-08-21

## Sheet: 2008
Docket No.	Petitioner	Product Name/Issue	Category	Receipt Date	Decision Date
FDA-2008-P-0197	W.J. Kennick	Determine whether Tomatis Electronic Ear is a medical device, refrain taking any administrative action and approve it as a medical device	Device	2008-03-20	2008-11-26
FDA-2008-P-0252	Richard W. Treharne, PhD	Withdraw FDA Policy on Establishing Preamendments Status	Device	2008-04-21	2010-12-21
FDA-2008-P-0319	Lauranell H. Burch	Ban the use of all Refractive Surgery Lasers for LASIK Surgery and Acknowledge and Enforce Remedy for the Misbranding of lasers used for LASIK	Device	2008-05-28	2009-07-16
FDA-2008-P-0061	Public Citizen Health Research Group	Require the Biologics License Application (BLA) holders of all formulations of botulinum toxin to issue a Dear Health Care Professional (DHCP)letter to black box warning	Drug	2008-01-23	2009-04-30
FDA-2008-P-0116	Campaign for Tobacco-Free Kids See FDA-2010-P-0089, 0454	Alter the manner in which it reviews, regulates, and labels nicotine replacement therapy medications	Other	2010-02-12	2013-04-01
FDA-2008-P-0211	University of Pennsylvania School of Medicine	Amend 21 CFR § 50.25, Elements of Informed Consent, by adding two additional subsections: • A description of deviations from standard medical practice and • A disclosure of investigator and referring physician conflicts of interest.	Other	2008-03-31	2010-01-20
FDA-2008-P-0296	Public Citizen Health Research Group	FDA withdraw approval of NDA for Ortho Evra	Drug	2008-05-08	2012-08-22
FDA-2008-P-0347	Joanne K. Tobacman, M.D.	FDA revoke the regulations in Title 21, Code of Federal Regulations (eFR) that permit the use of carrageenan for direct addition to food	Other	2008-06-11	2012-06-11
FDA-2008-P-0545	Washington State University	that FDA "reexamine the current policy on collecting blood donations from men who have sex with men (MSM)"	Other	2008-09-04	2010-05-27
FDA-2008-P-0577	Natural Resources Defense Council	Issue a regulation prohibiting the use of bisphenol A (in human food and food packaging, and revoke all regulations permitting the use of any food additive that may result in BPA becoming a component of food	Other	2008-10-28	2012-03-30
FDA-2008-P-0580	Public Citizen	Review issues related to the safety and efficacy of, and ban the use of thiazolidinedione (TZD) or "glitazone" diabetes drug products.	Other	2008-10-30	2011-11-21
FDA-2008-P-0486	Norman W. Lefkovitz, M.D	Strengthen its regulation of controlled prescription drugs	Drug	2008-09-04	2013-11-29
FDA-2008-P-0074	Cornucopia Institute	Take regulatory action to revise the existing regulations by requiring labeling on all infant formula containing the long chain polyunsaturated fatty acids (LCPUFAs) docosahexaenoic acid (DHA) and arachidonic acid (ARA) from algal and fungal sources	Other	2008-01-24	2011-09-28
FDA-2008-P-0219	Buchanan Ingersoll & Rooney PC	Regulation of tannates in cough/cold medicine and refrain from any categorical regulation of same.	Drug	2008-01-03	2011-03-01
FDA-2008-P-0291	PRN Publishing	FDA amend the regulations applicable to prescription drug product labels to require those labels to include the new drug application (NDA) number, as listed in FDA's Approved Drug Products with Therapeutic Equivalence Evaluations (the Orange Book), under which the drug products were produced.	Other	2008-05-06	2012-01-06
FDA-2008-P-0380	National Association of Chaio Drug Stores	Take a number of actions to consolidate and replace current patient labeling and information distributed in pharmacies about prescription drugs	Other	2008-07-01	2010-11-23
FDA-2008-P-0531	University of Virginia Health System	Petition to Ban Cornstarch Powder on Medical Gloves	Device	2008-10-02
FDA-2008-P-0585	Elliot Farber	Reclassify artificial eyes lubricant from class III to class I	Device	2008-11-04
FDA-2008-P-0630	The Prescription Project	Address the Growth of Online/Internet Advertising of Drugs and Devices	Device	2008-12-08
FDA-2008-P-0086	Honorable Russell D. Feingold United States Senate	Allow fluid ultrafiltered (UF) milk in domestic cheese with a standard of identity	Other	2008-02-11
FDA-2008-P-0136	Jeffrey Utterback	Determine limit for gluten in a food labeled gluten-free	Other	2008-08-21
FDA-2008-P-0242	National Toxic Encephalopathy Foundation	Declare Angel Men Eau du Toilette by Thierry Mugler imported and distributed into the United States by Clarins USA to be misbranded and mislabeled	Other	2008-01-04
FDA-2008-P-0246	Consumers Union	Require that all television advertisements for prescription drugs and over the counter drugs include a toll-free number and a website address for the public to report side effects to the agency.	Other	2008-01-09
FDA-2008-P-0309	University of Illinois at Chicago; School of Public Health, MC 922	Require that all cosmetic talc products bear labels with a warning such as Frequent application of talcum powder in the female genital area substantially increase the risk of ovarian cancer.	Other	2008-05-15	2014-04-01
FDA-2008-P-0333	Mr. Michael Weber	Determine that wheat gluten as a pharmaceutical excipient is not generally recognized as safe or, in cases where no alternative is available, impose new labeling requirements.	Other	2008-06-02	2015-05-12
FDA-2008-P-0346	Jacob S. Briskman	Develop and implement a rule for the submission of an Investigational New Drug Application that would mandate that FDA create libraries of raw research data derived from all phases of clinical trials.	Other	2008-06-04
FDA-2008-P-0358	James P. Reichmann	Reclassify terbutaline sulfate from pregnancy risk category B to category C,D, or X; (2) require terbutaline manufacturers to amend labeling to reflect its change in pregnancy risk category; (3) notify obstetricians of the reclassification; (4) issue another Dear Colleague letter alerting health care professionals regarding safety concerns associated with continuous subcutaneous terbutaline pump …	Device	2008-06-18
FDA-2008-P-0452	The Weston A. Price Foundation	Revoke the final rule regarding Health Claims for Soy Protein and Reduced Risk of Coronary Heart Disease.	Other	2008-08-11	2016-01-04
FDA-2008-P-0509	Ms. Hallie J. Davis	Request that rye and barley be identified as major food allergens	Other	2008-06-05
FDA-2008-P-0632	The Prescription Proiect of Community Catalyst	Take enforcement action regarding online video advertisements posted on www.YouTube.com promoting Medtronic's medical device, the PRESTIGE Cervical Disc	Other	2008-12-05
FDA-2008-P-0634	The Prescription Project of Community Catalyst	Take enforcement action regarding online video advertisements posted on www.YouTube.com promoting Stryer's medical device	Other	2008-12-05

## Sheet: 2007
Docket No.	Petitioner	Product Name/Issue	Category	Receipt Date	Decision Date
FDA-2007-P-0009 and FDA-2009-P-0227	National Center on Addition and Substance Abuse (Columbia University)	Promulgate regulations inteded to strength FDA regulation of opoids and other controlled drugs and to help minimize risks of diversion and abuse of such drugs (two related petitions)	Drug	2007-10-25	2013-06-17
FDA-2007-P-0110	Physicians Committee for Responsible Medicine	Revise the labeling for all drugs in the thiazolidinedione class to include information that "a low-fat plant-based diet has an efficacy and safety profile that can be as favorable as, or more favorable than, oral medications for managing diabetes"	Drug	2007-12-18	2010-10-21
FDA-2007-P-0122	Compassion over Killing; Penn Law Animal Law Project	Take regulatory action to revise the current labeling requirements for eggs to provide for certain terms related to egg production	Other	2007-02-21	2013-08-28
FDA-2007-P-0178	John Edward Erb	Revoke the generally recognized as safe (GRAS) status of monosodium glutamate (MSG)	Other	2007-12-21	2012-11-08
FDA-2007-P-0180	The Alliance Against Alveolar Soft Part Sarcoma and Sarcoma Foundation of America (with lawyer)	Issue a guidance document that explains how a new drug application (NDA) for a drug or biologic license application (BLA) for a biologic intended to treat a rare cancer, such as alveolar soft part sarcoma (ASPS), could meet accelerated approval requirements (Petition at 1).	Drug	2007-10-26	2010-06-28
FDA-2007-P-0190	Public Citizen/University of Leiden	Immediately ban third-generation combination oral contraceptives (COCs) containing desogestrel	Drug	2007-02-06	2013-01-11
FDA-2007-P-0232	Coalition for Mercury-free Drugs	Take numerous actions pertaining to vaccines and other FDA-regulated products containing thimerosal or other mercury-based preservatives	Drug	2007-08-10	2008-11-21
FDA-2007-P-0234	Terence J Mix	Reconsider its September 8, 2009, response (Original Petition Response) denying your original citizen petition received on November 29, 2007 (OriginalPetition). The Original Petition requested that FDA require certain changes to the labeling for Clomid (clomiphene citrate) and that FDA require risk evaluation and mitigation strategies(REMS) and postmarket studies and/or clinical trials for these …	Drug	2007-11-29	2012-03-08
FDA-2007-P-0293	David Richardson	Sanction a third-party, independent scientific analysis of zinc gluconate's effect on human olfactory cilia tissue and, if the Agency agrees that there is a scientific correlation between zinc gluconate and the loss of tasteand smell, remove Zicam Cold Remedy Nasal Gel from the market	Drug	2007-03-05	2012-06-22
FDA-2007-P-0345	Cooley Godward	Withdraw the commercial marketing authorization for oral sodium phosphate (OSP) products for bowel cleansing, or add a black box warning to OSP products regarding the potential risks of renal failure	Other	2007-09-20	2008-12-11
FDA-2007-P-0346	Richards Sauerheber	Ban unnaturally synthesized fluoride compounds used in U.S. municipal water districts to fluoridate drinking water	Other	2007-09-25	2010-10-27
FDA-2007-P-0401	Public Citizen Interest Group	Issue a policy statement requiring that FDA staff make an oral scientific presentation on the products reviewed, including a thorough safety and efficacy assessment, at all of FDA's Center for Drug Evaluation and Research (CDER) advisory committee meetings discussing a specific drug product	Other	2007-06-21	2010-07-16
FDA-2007-P-0413	Pharmacist Planning Services	Standardize and increase the print size for direct-to-consumer (DTC) advertising of prescription drug products, over-the-counter (OTC) drug products, and herbal products to enhance their readability	Other	2007-02-14	2013-06-10
FDA-2007-P-0118 FDA-2007-P-0066	Thomas J. Quinn	Strict and immediate enforcement of performance standards contained in: 21 CFR 10.20(g)(h) and 1020.33(c); 21 CFR 1040.10(h); 21 CFR 820.170	Device	2007-08-27	2009-09-08
FDA-2007-P-0464	Ralph D. Childs	Determine "a means to calculate Computed Tomography dosage index, dose profile and dosage measurement for a dual tube CT system	Device	2007-10-03	2009-09-08
FDA-2007-P-0184	Judy Slome Cohain	Restore FDA approval to Tecsana Epi-no birth trainer and to remove the adverse event report on Tecsana Epi-No from FDA website	Device	2007-12-12	2008-08-08
FDA-2007-P-0417	Consumer's Union	Require print and electronic advertisements, including Internet advertisements, for implantable devices such as knee, hip, heart valves, cosmetic implants, and other devices	Device	2007-12-17	2010-03-30
FDA-2007-P-0339	Medical Specialists	Prohibit the use of Lovenox (enoxaparin sodium) in patients with acute or chronicrenal failure and in patients over 65 years of age	Drug	2007-08-13	12/14 (year missing)
FDA-2007-P-0051	Sidelines National Support Network	request that the Commissioner revoke theorphan-drug designation which was assigned to Adeza Biomedical’s 17 ct-Hydroxyprogesterone caproate’s product.	Drug	2007-10-24	2011-02-03
FDA-2007-P-0116	Dean Andrew Kantis	Ensure the safety of Americans regarding the misuses of Lasik	Device	2007-01-05
FDA-2007-P-0416	Sapna Lohiya	Require certain formatting parameters. such as fontsize, boldfacing. and column spacing (for drug expiration dates)	Other	2007-11-20
FDA-2007-P-0064	Center for Dematology and Laser Surgery	Request withdrawal of approval and recall of Ziana or, at a minimum, the initiation of long term safety studies evaluating the incidence and prevalence of antibiotic resistance associated with Ziana usage	Drug	2007-05-21
FDA-2007-P-0066	William Driscoll	Seek the creation of a new policy to achieve expanded accelerated development and production of pre-pandemic and pandemic vaccine	Drug	2007-12-06
FDA-2007-P-0107	William Driscoll (Vaccine for All)	Amend 21 C.F.R. 312 promotion and charging for investigational drugs re: pandemic vaccine	Drug	2006-12-28
FDA-2007-P-0108	Leslie Hendeles, Professor, U of Florida	Amend the Dosage of Oral Phenylephrine	Drug	2007-02-07
FDA-2007-P-0115	Clinical & Laboratory Standards Institute (CLSI)	Evaluate "clear new susceptibility test devices or modifications of existing devices using CLSI interpretive breakpoints interpretive breakpoints" in certain instances ; and (2) allow 510(k) clearance of devices for antimicrobial susceptibility testing of Streptococcus pneumoniae	Device	2007-06-29
FDA-2007-P-0117	Sanford J Lewis (Health Care without Harm)	Issue a regulation or guideline to label medical devices that leach DEHP plasticizers	Device	2007-08-14
FDA-2007-P-0119	Univ Illinois/Chicago SPH	Label milk and other dairy products produced with the use of posilac with a cancer risk warning	Drug	2007-02-20	2016-03-21
FDA-2007-P-0243	Michael Dochniak	Issue a regulation for Hevea Basiliensis natural-rubber-latex, used in the manufacture of infant products	Other	2007-12-19
FDA-2007-P-0290	Dawn Densmore	Require all products labels to include this information : Products % Costs Packaging : 80% Content: 20%"	Other	2007-07-13
FDA-2007-P-0301	Jennifer McGinn	Revoke 21 C.F.R. 165.110(a)(2)(vi)	Other	2007-03-13	2014-03-19
FDA-2007-P-0344	John Brahm III	Issue a new regulation wine product the composition of wine, water, sugar, with or without flavorings and an alcohol content of less than 75% can not be marketed or sold with a wine varietal designation	Other	2007-02-27
FDA-2007-P-0404	Ellen Ashworth	Amend its regulations for the Nutrition Facts Label as it relates to trans fats	Other	2007-01-23
FDA-2007-P-0412	Cary Smith	Revoke the food-processing permit granted to Bella Cucina Artful Food	Other	2007-04-03
FDA-2007-P-0414	Victor Yu, MD	Modify the in vitrobreakpoints for penicillin and Streptococcus pneumoniae originally set by Clinical andLaboratory Standards Institute	Other	2007-01-16	2016-03-22
FDA-2007-P-0050	American Academy of Pediatricians	Take action related to OTC cough and cold drug products for children under 6	Drug	2007-03-01
FDA-2007-P-0299	Clinical & Laboratory Standards Institute (CLSI)	Request that CDER update the official drug labels for penicillin G potassium and penicillin G sodium for injection	Drug	2007-07-03	2016-02-18

[truncated: 8 more sheets: 2006, 2005, 2004, 2003, 2002, 2001, Sheet2, Sheet3]
